# Supplementary material for: Novel 11-Substituted Ellipticines as Potent Anticancer Agents with Divergent Activity against Cancer Cells
Source: MDPI journal article supplement (doi:10.3390/ph12020090), 2019-06-14

# Novel 11-substituted ellipticines as potent anticancer agents with divergent activity against cancer cells

Charlotte M. Miller<sup>1</sup>, Elaine C. O'Sullivan<sup>1</sup> and Florence O. McCarthy<sup>1\*</sup>

<sup>1</sup> School of Chemistry, Analytical and Biological Chemistry Research Facility, University College Cork, Western Road, Cork, Ireland

\* Correspondence: f.mccarthy@ucc.ie; Tel.: +353-21-4901695

Figures S1-S3    <sup>1</sup>H NMRs of relevant compounds

Figure S4        Three-fold dilution topoisomerase II inhibition assay of compounds **13** and **16**

Figure S5-S10    One dose NCI 60 cancer cell growth data (10 $\mu$ M)

Figure S11-S13   Five dose NCI 60 cancer cell growth data with GI50, TGI and LC50 data for compound **11**

Figure S14-S16   Five dose NCI 60 cancer cell growth data with GI50, TGI and LC50 data for compound **13**

Figure S17:       COMPARE Analysis data for compound **13** in direct comparison with SCH1473759 (NSC761691), an Aurora kinase inhibitor.

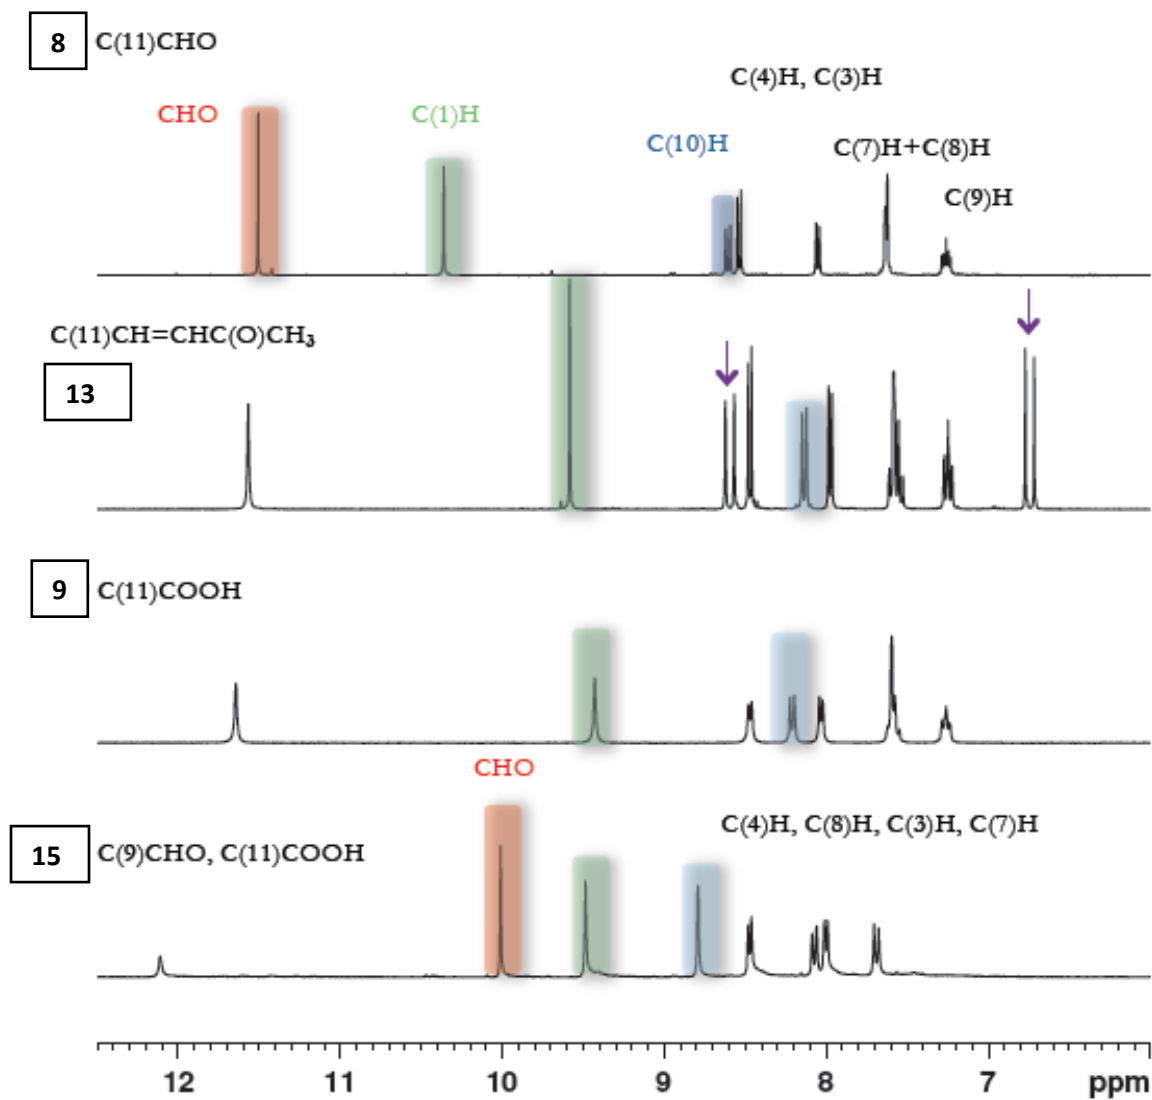

Figure S1: Stacked <sup>1</sup>H NMR plots of the aromatic regions of 11-substituted Ellipticines 8, 9, 13, and 15 measured in DMSO-*d*<sub>6</sub> at 300MHz

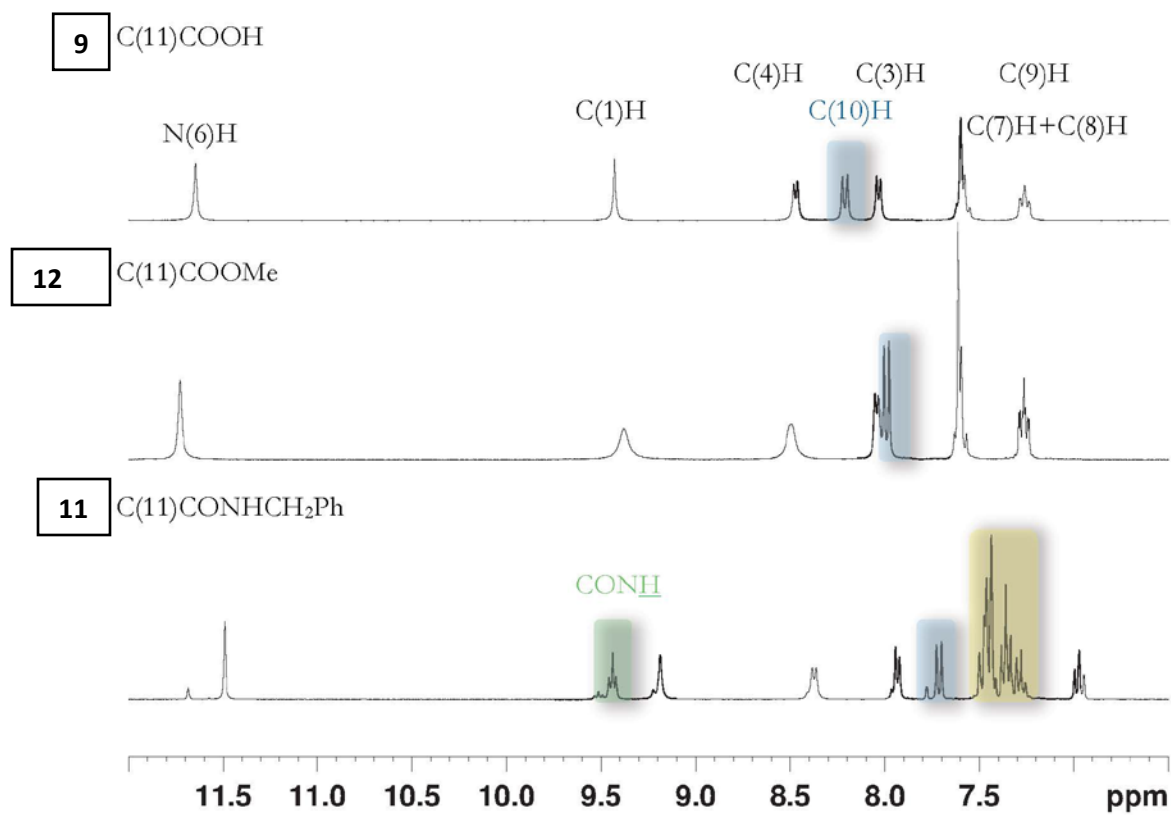

**Figure S2: Stacked <sup>1</sup>H NMR plots of the aromatic regions of 11-substituted Ellipticines 9, 11 and 12 measured in DMSO-*d*<sub>6</sub> at 300MHz**

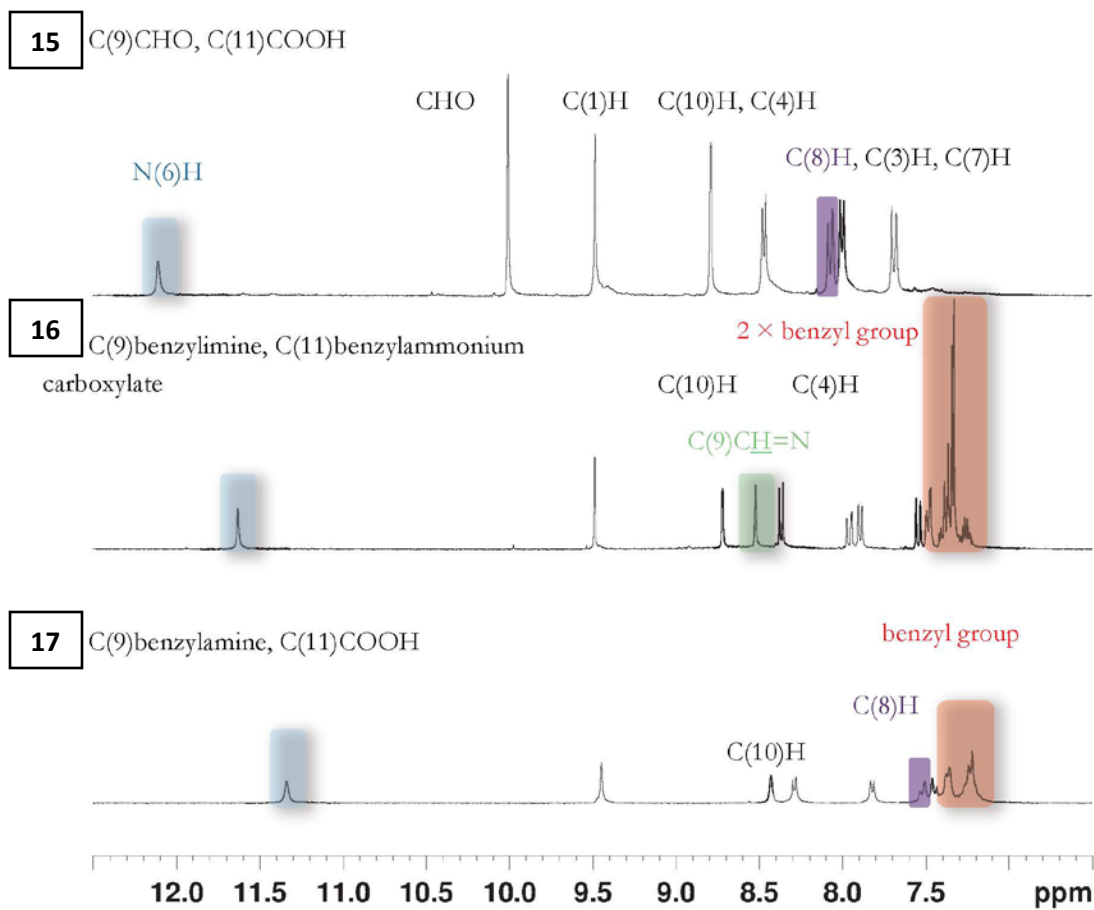

**Figure S3: Stacked  $^1\text{H}$  NMR plots of the aromatic regions of 11-substituted Ellipticines 15, 16 and 17 measured in  $\text{DMSO-}d_6$  at 300MHz**

Figure S4: Three fold dilution assay for compound 13 (lanes 1-3; 100-1uM) and 16 (lanes 4-6; 100-1uM); A & B are positive and negative control respectively.

$\mu\text{M}$ :            100    10    1    100    10    1  
A    B    1    2    3    4    5    6

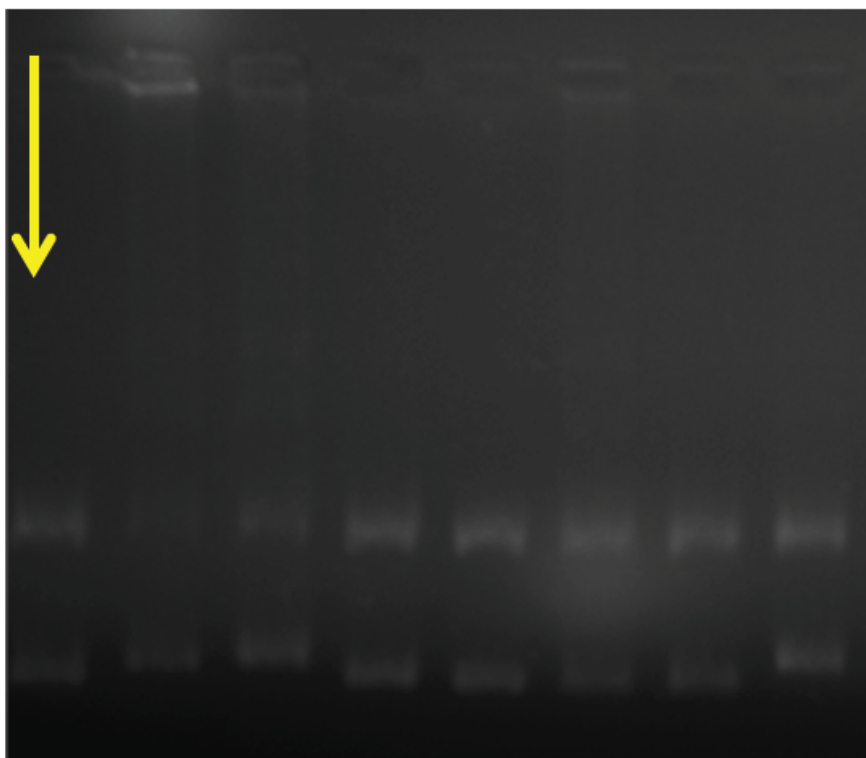

Figure S5: One dose assay (10μM) NCI 60 cell lines growth data for compound 9

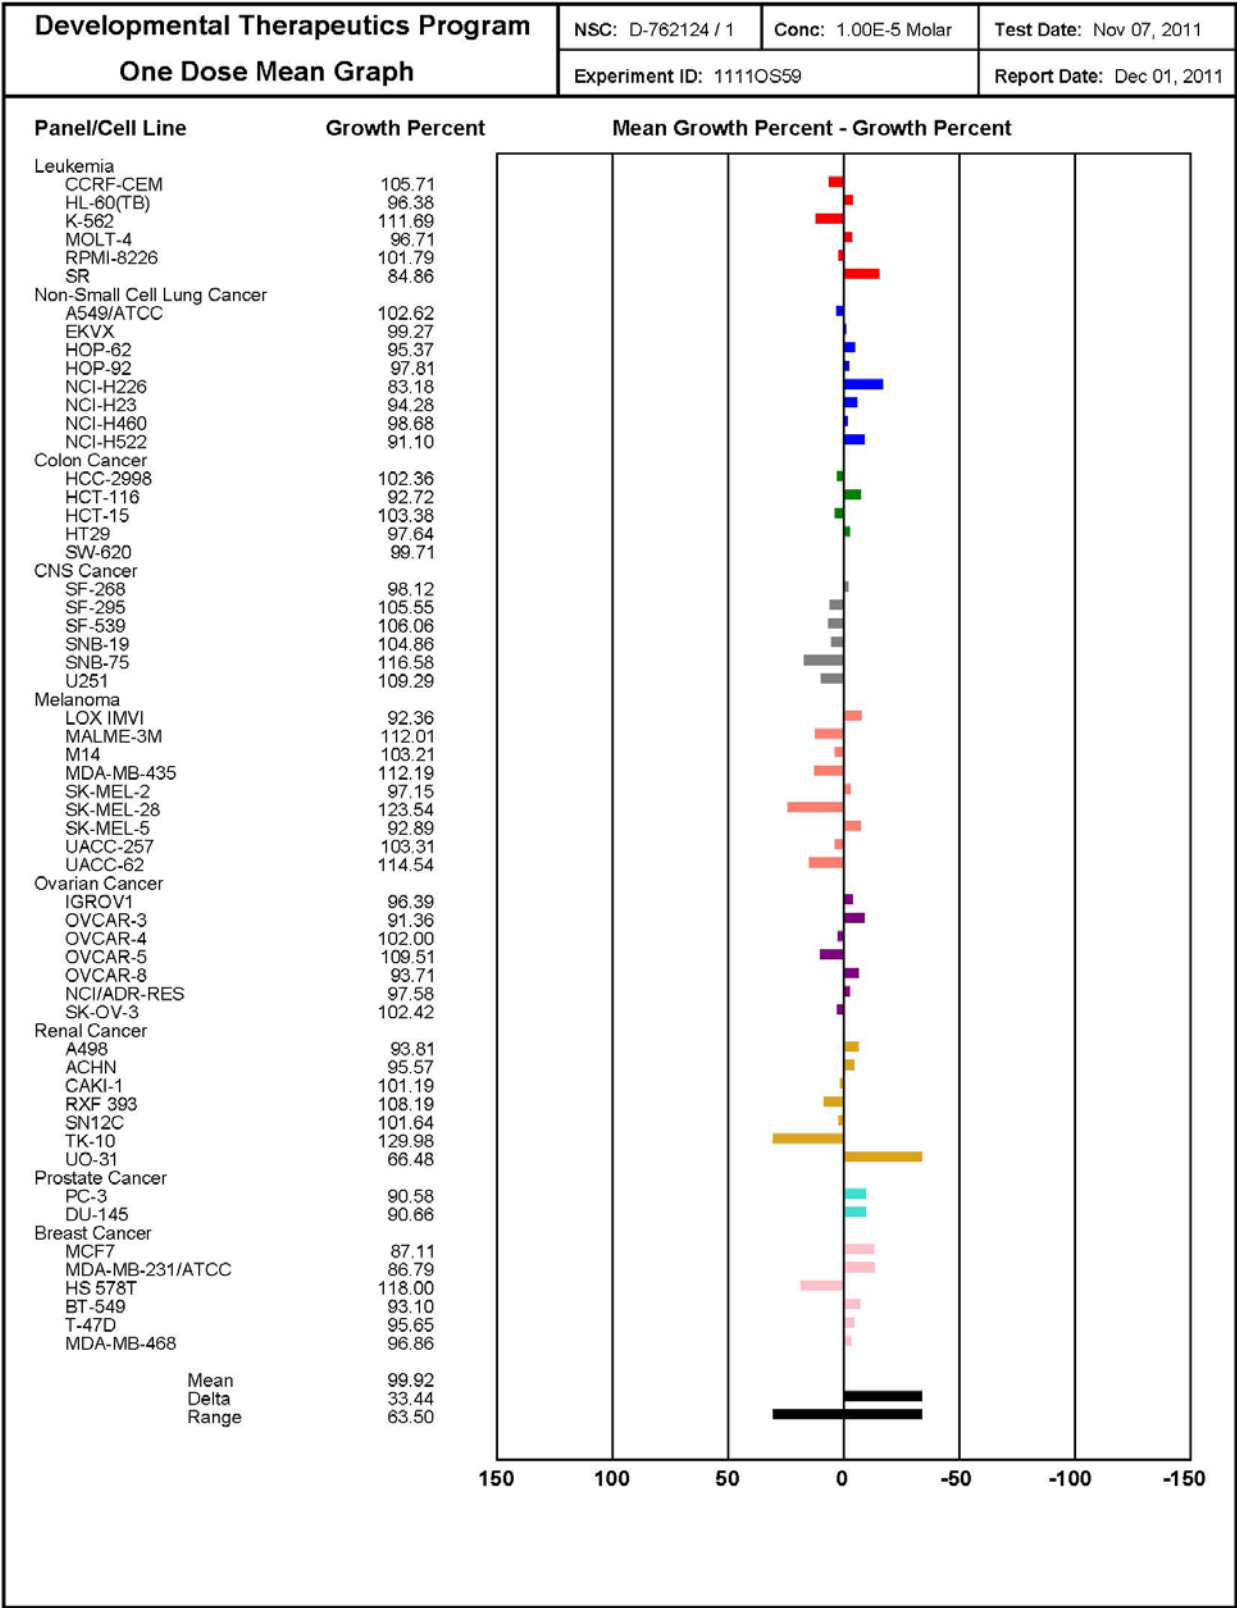

Figure S6: One dose assay (10μM) NCI 60 cell lines growth data for compound 11

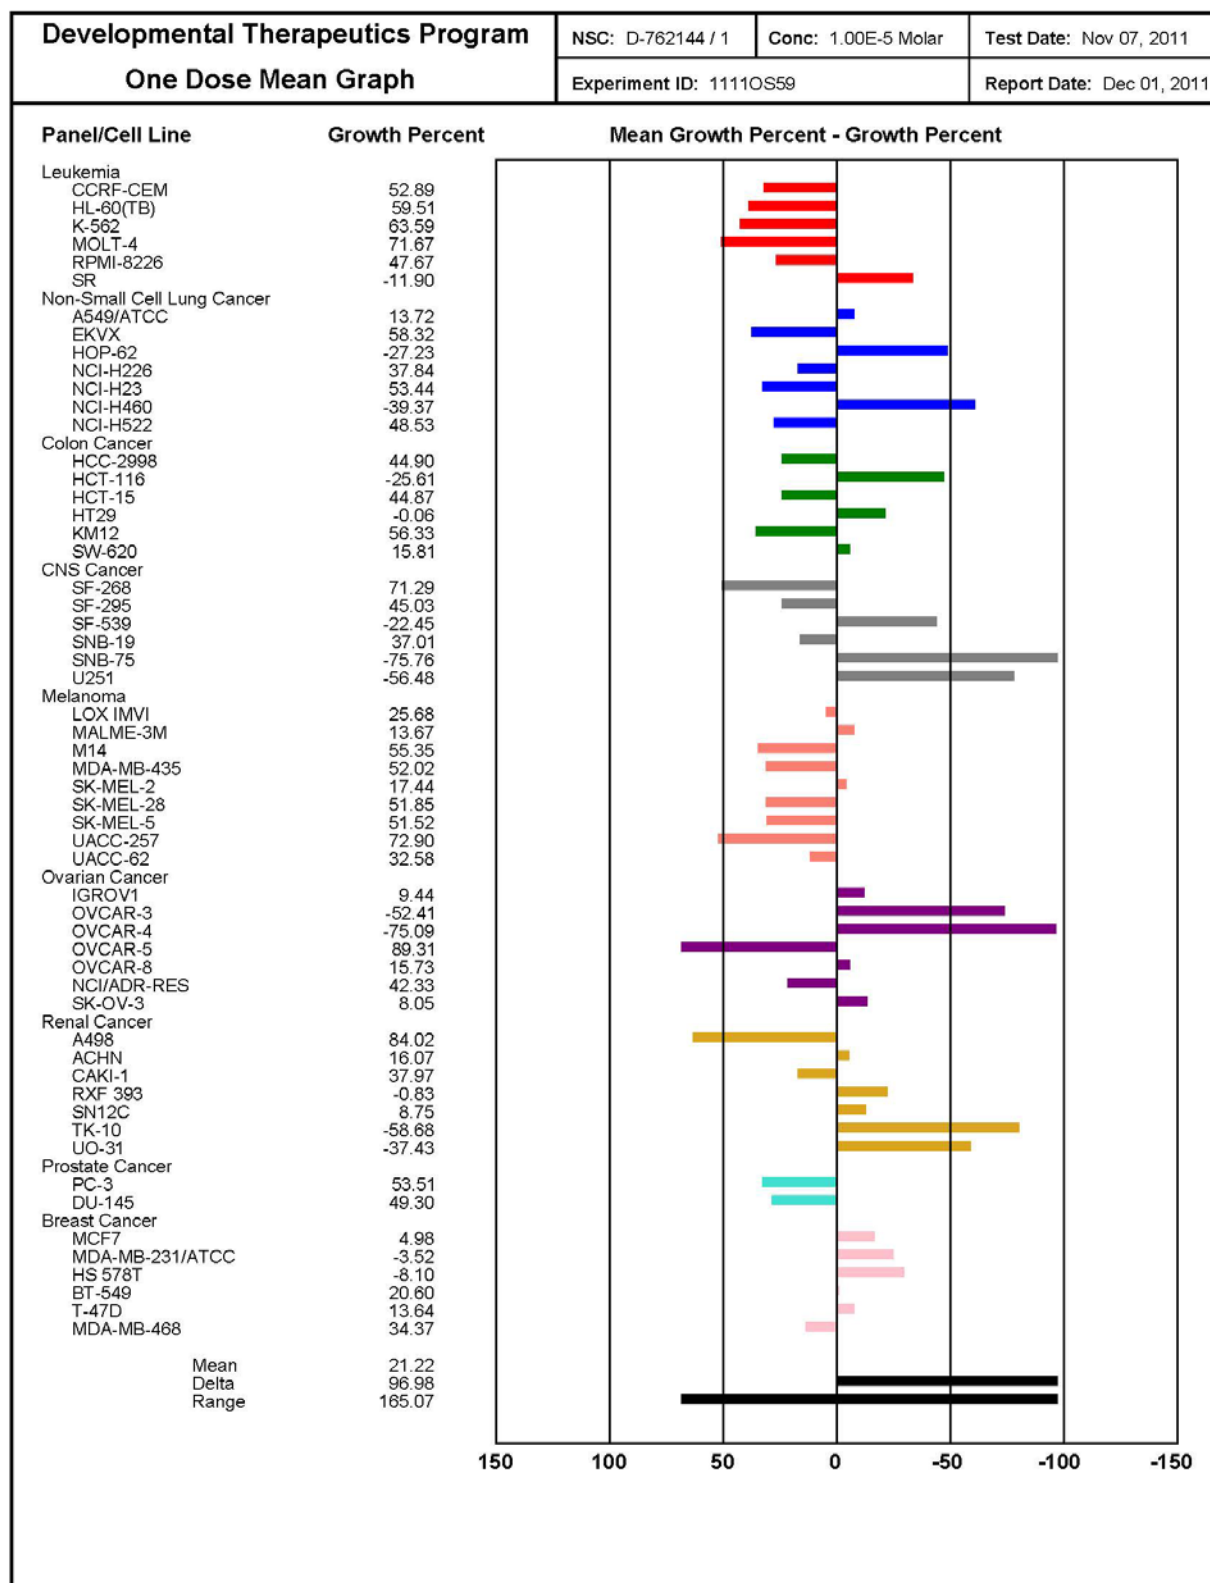

Figure S7: One dose assay (10µM) NCI 60 cell lines growth data for compound 13

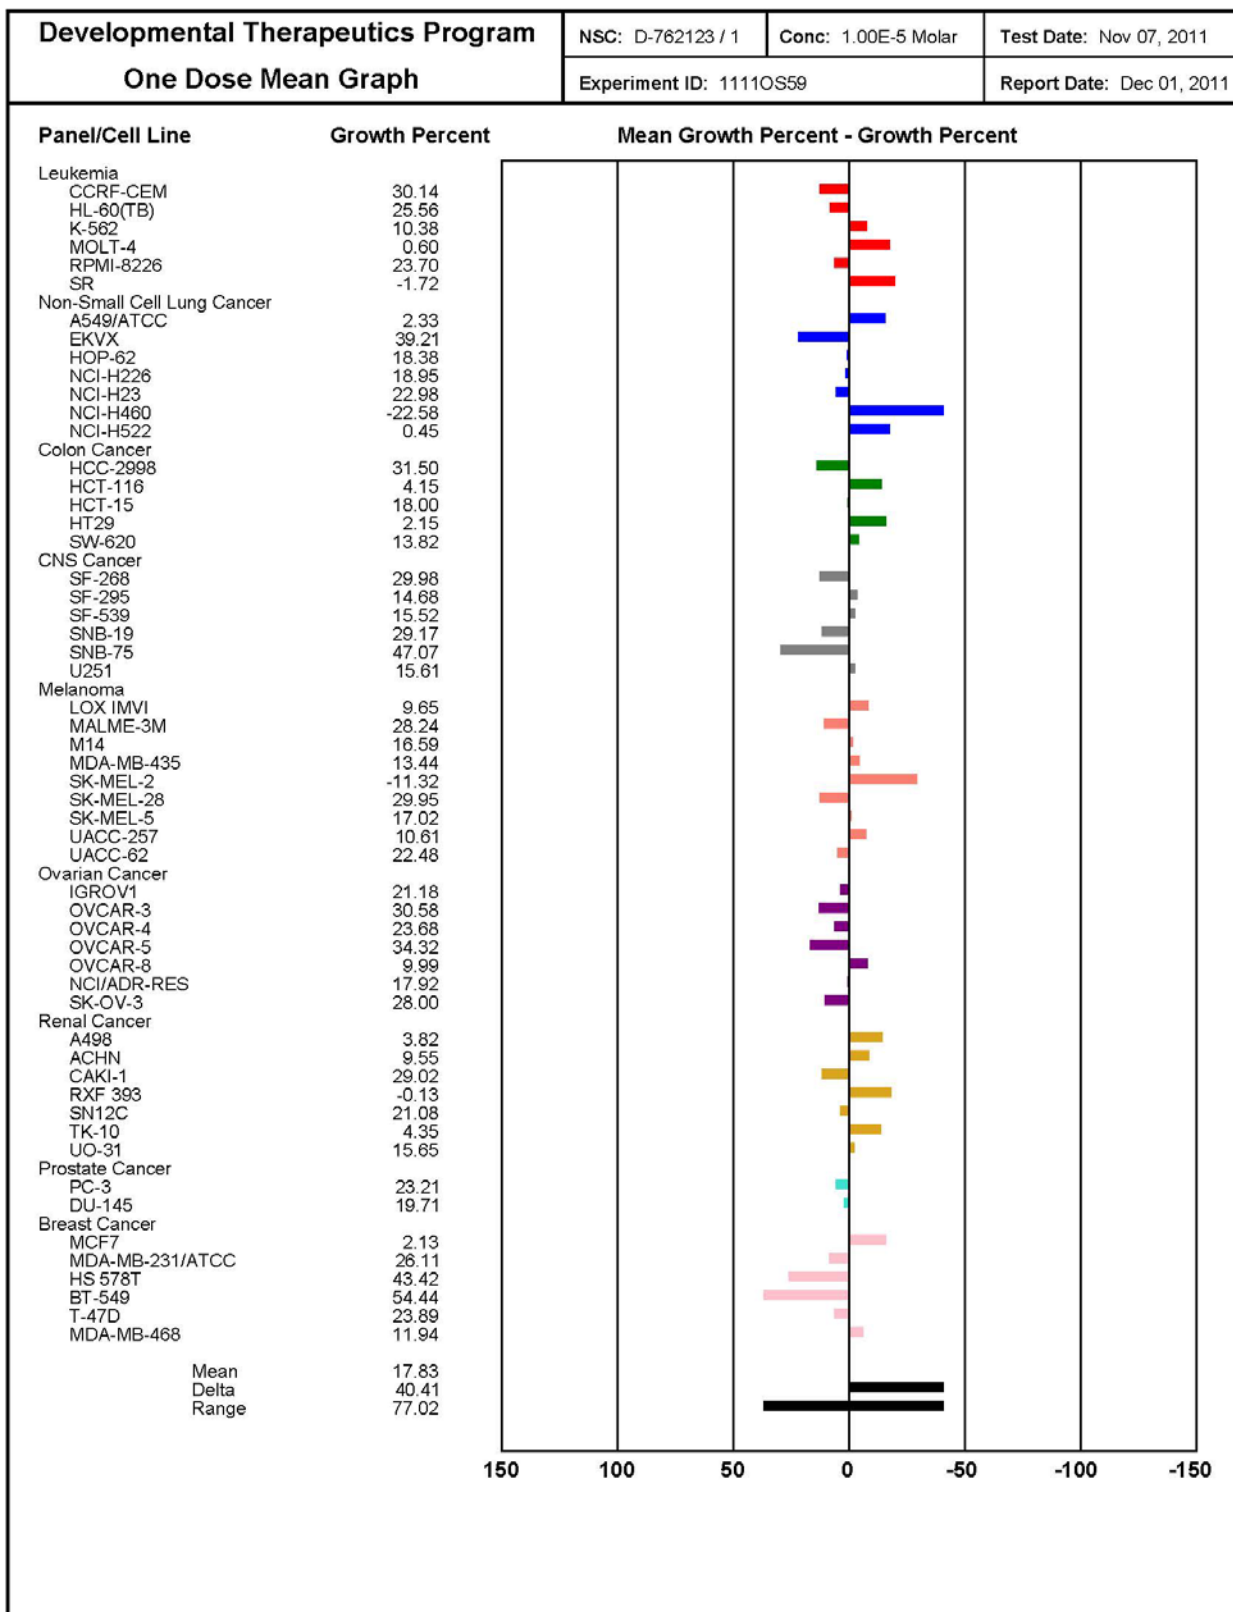



Figure S8: One dose assay (10µM) NCI 60 cell lines growth data for compound 15

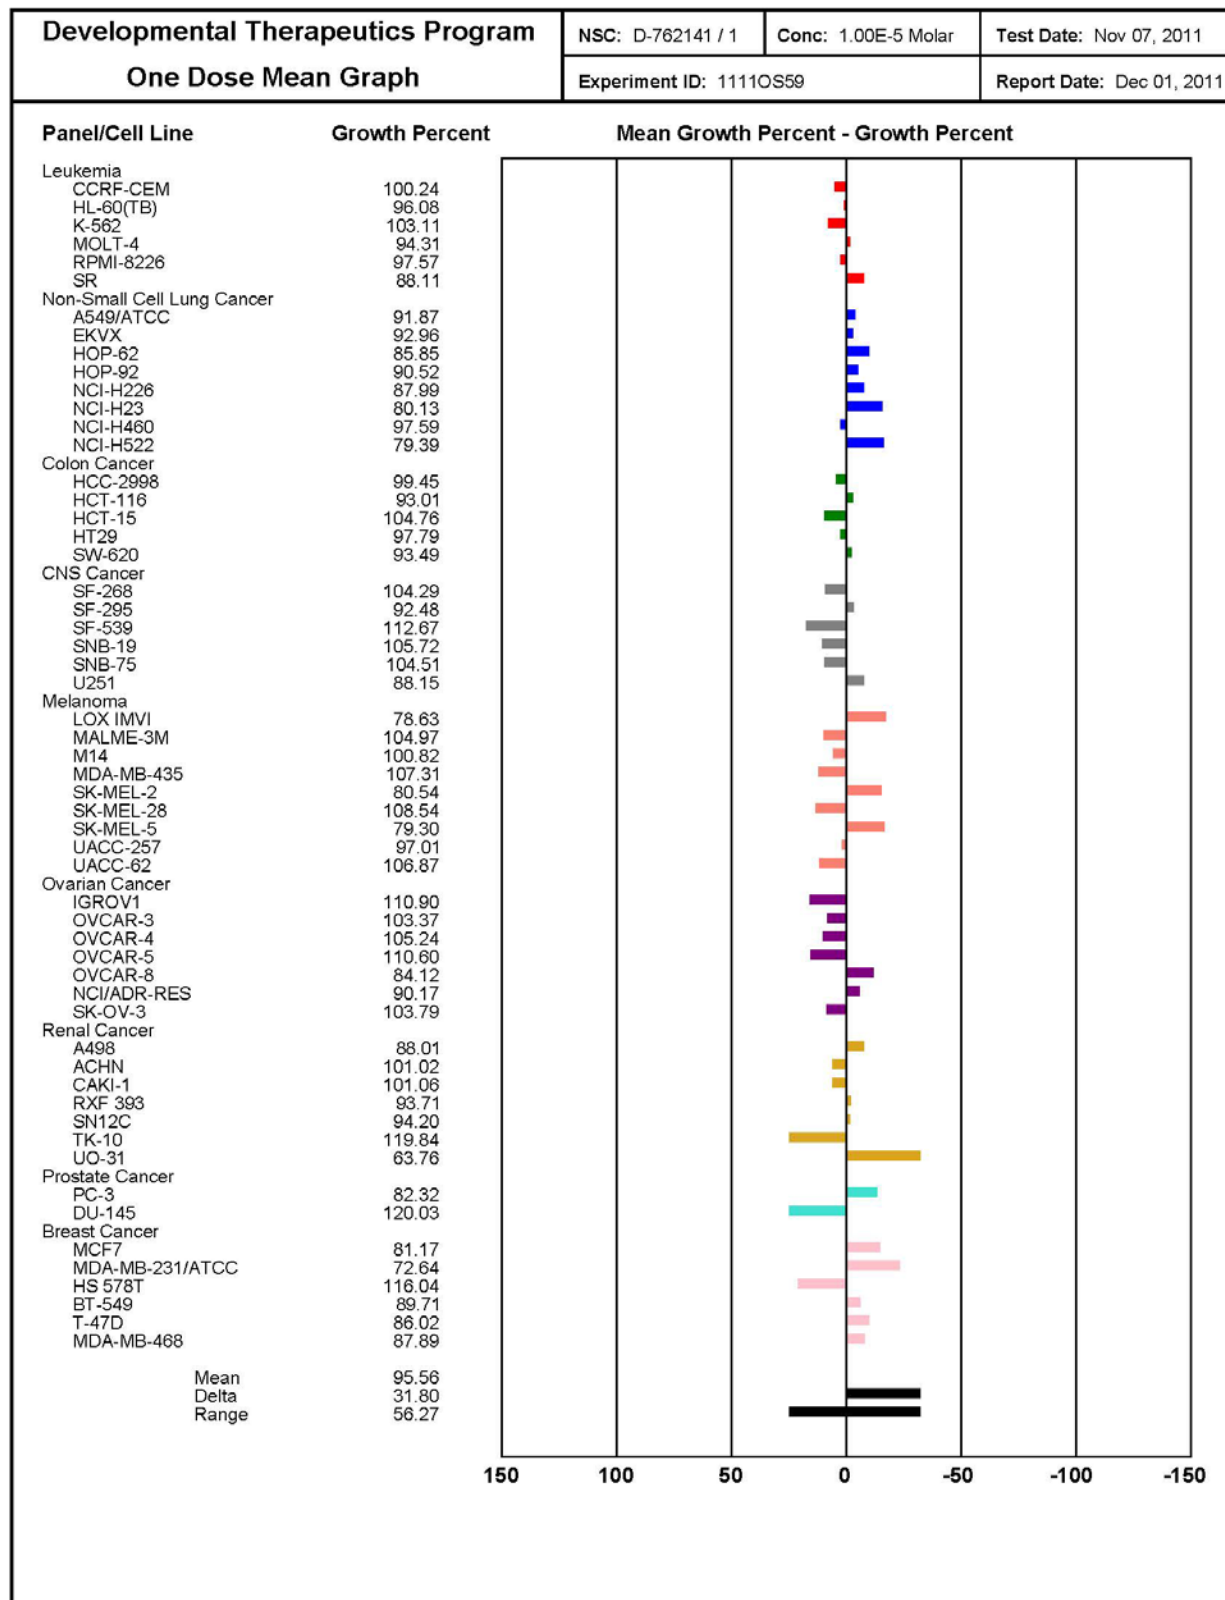

Figure S9: One dose assay (10 $\mu$ M) NCI 60 cell lines growth data for compound 16

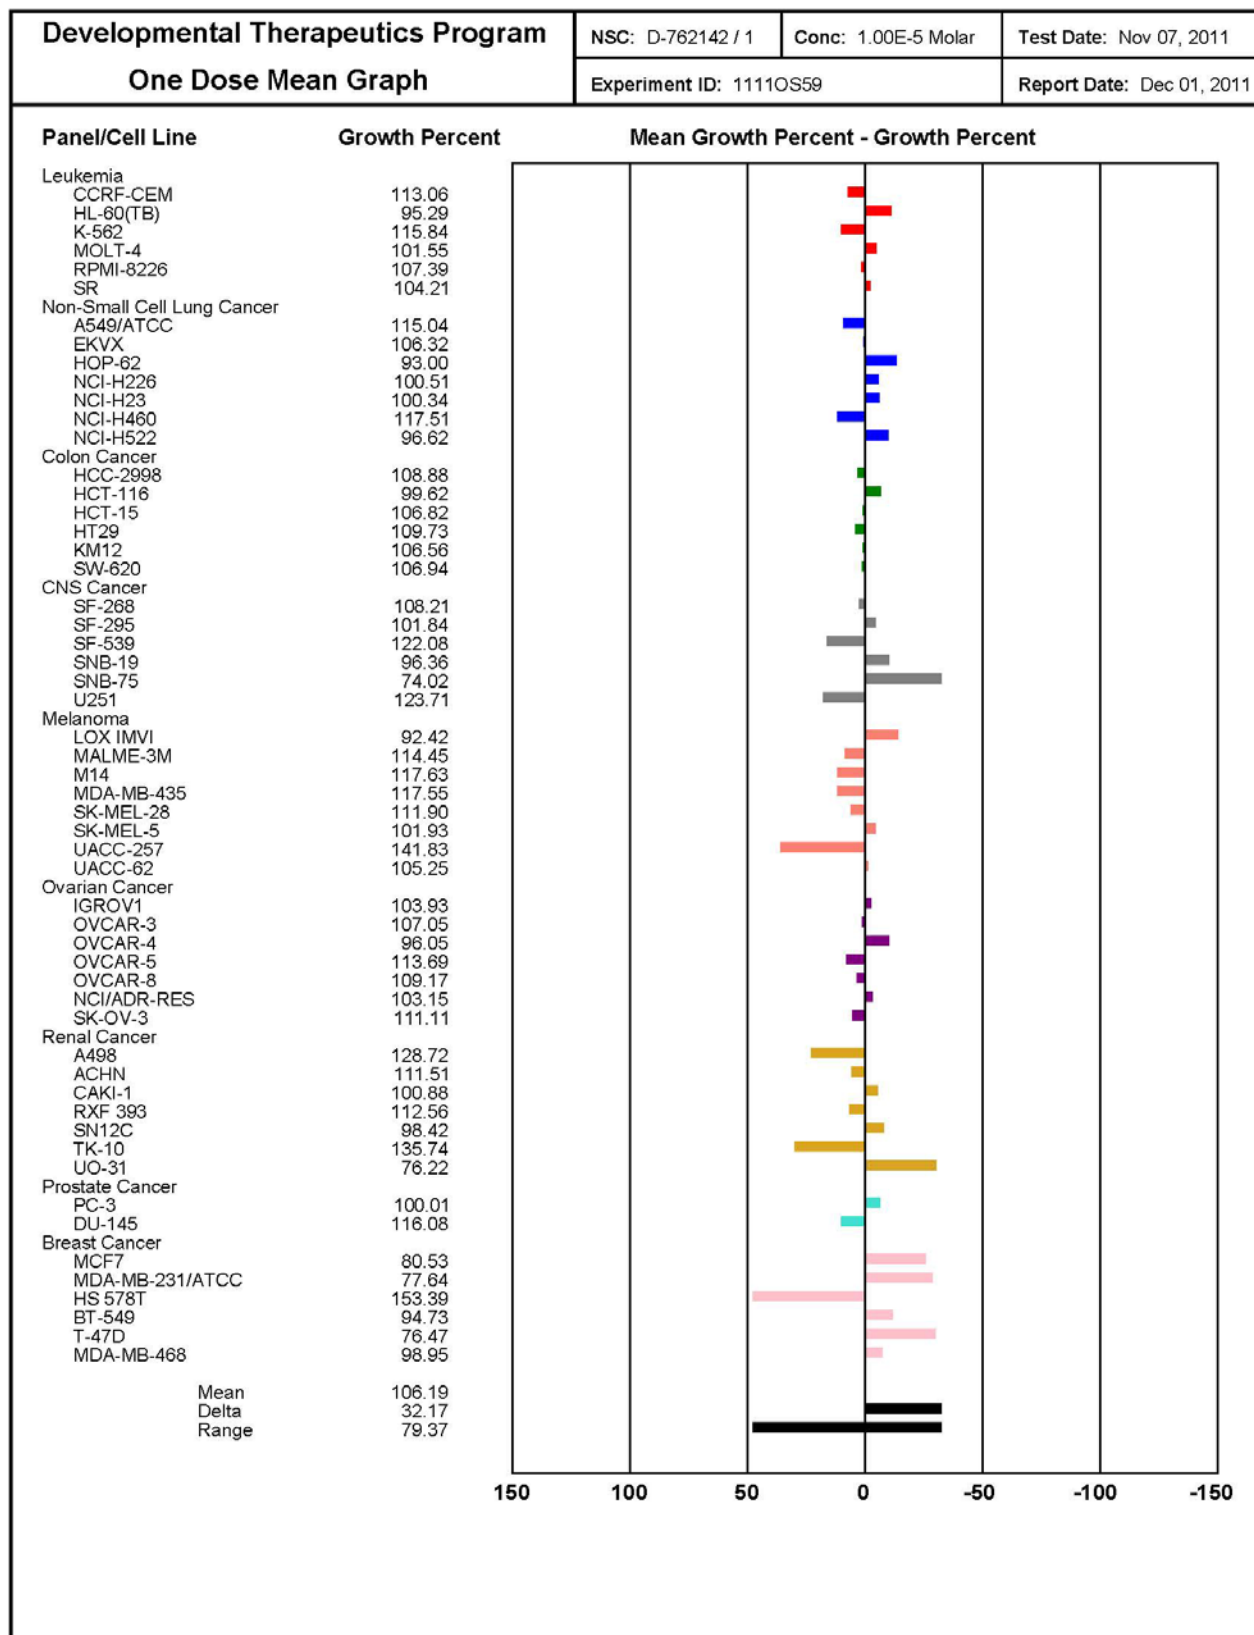

Figure S10: One dose assay (10µM) NCI 60 cell lines growth data for compound 17

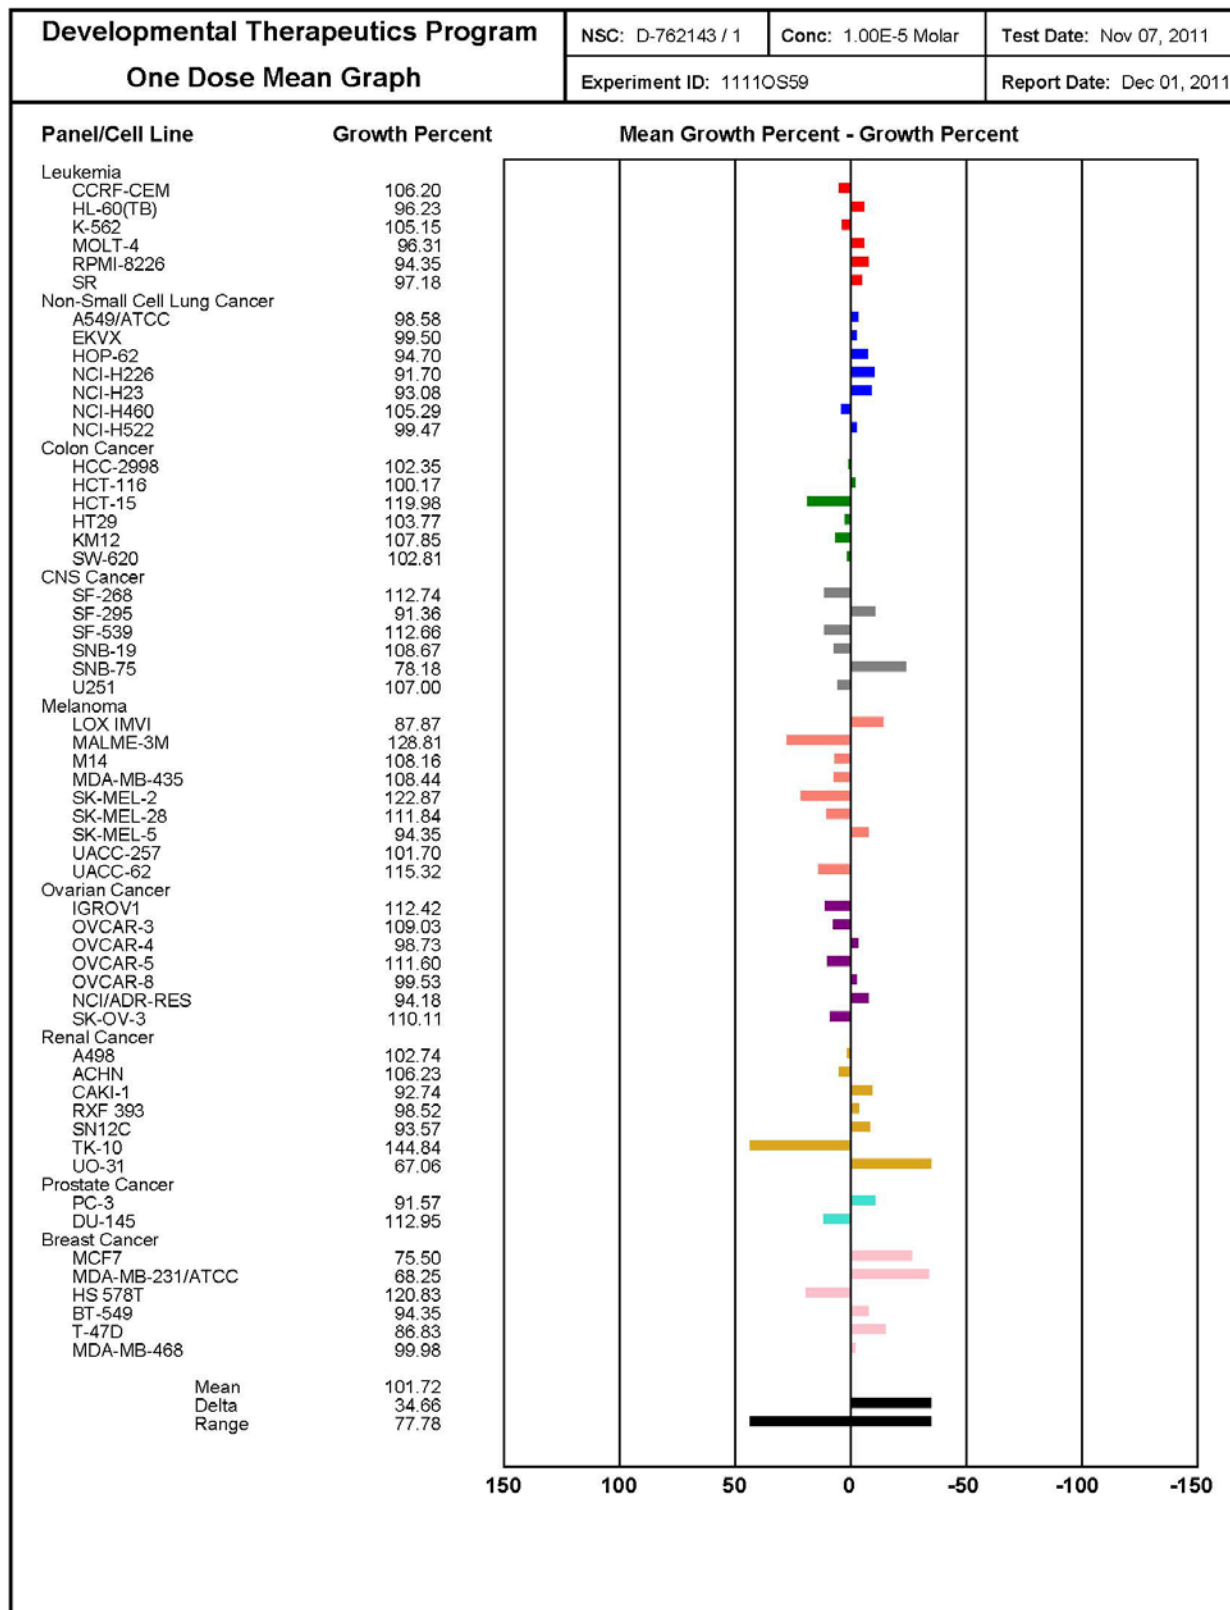

Figure S11: Five Dose Assay data graph from NCI 60 cell lines growth for compound 11

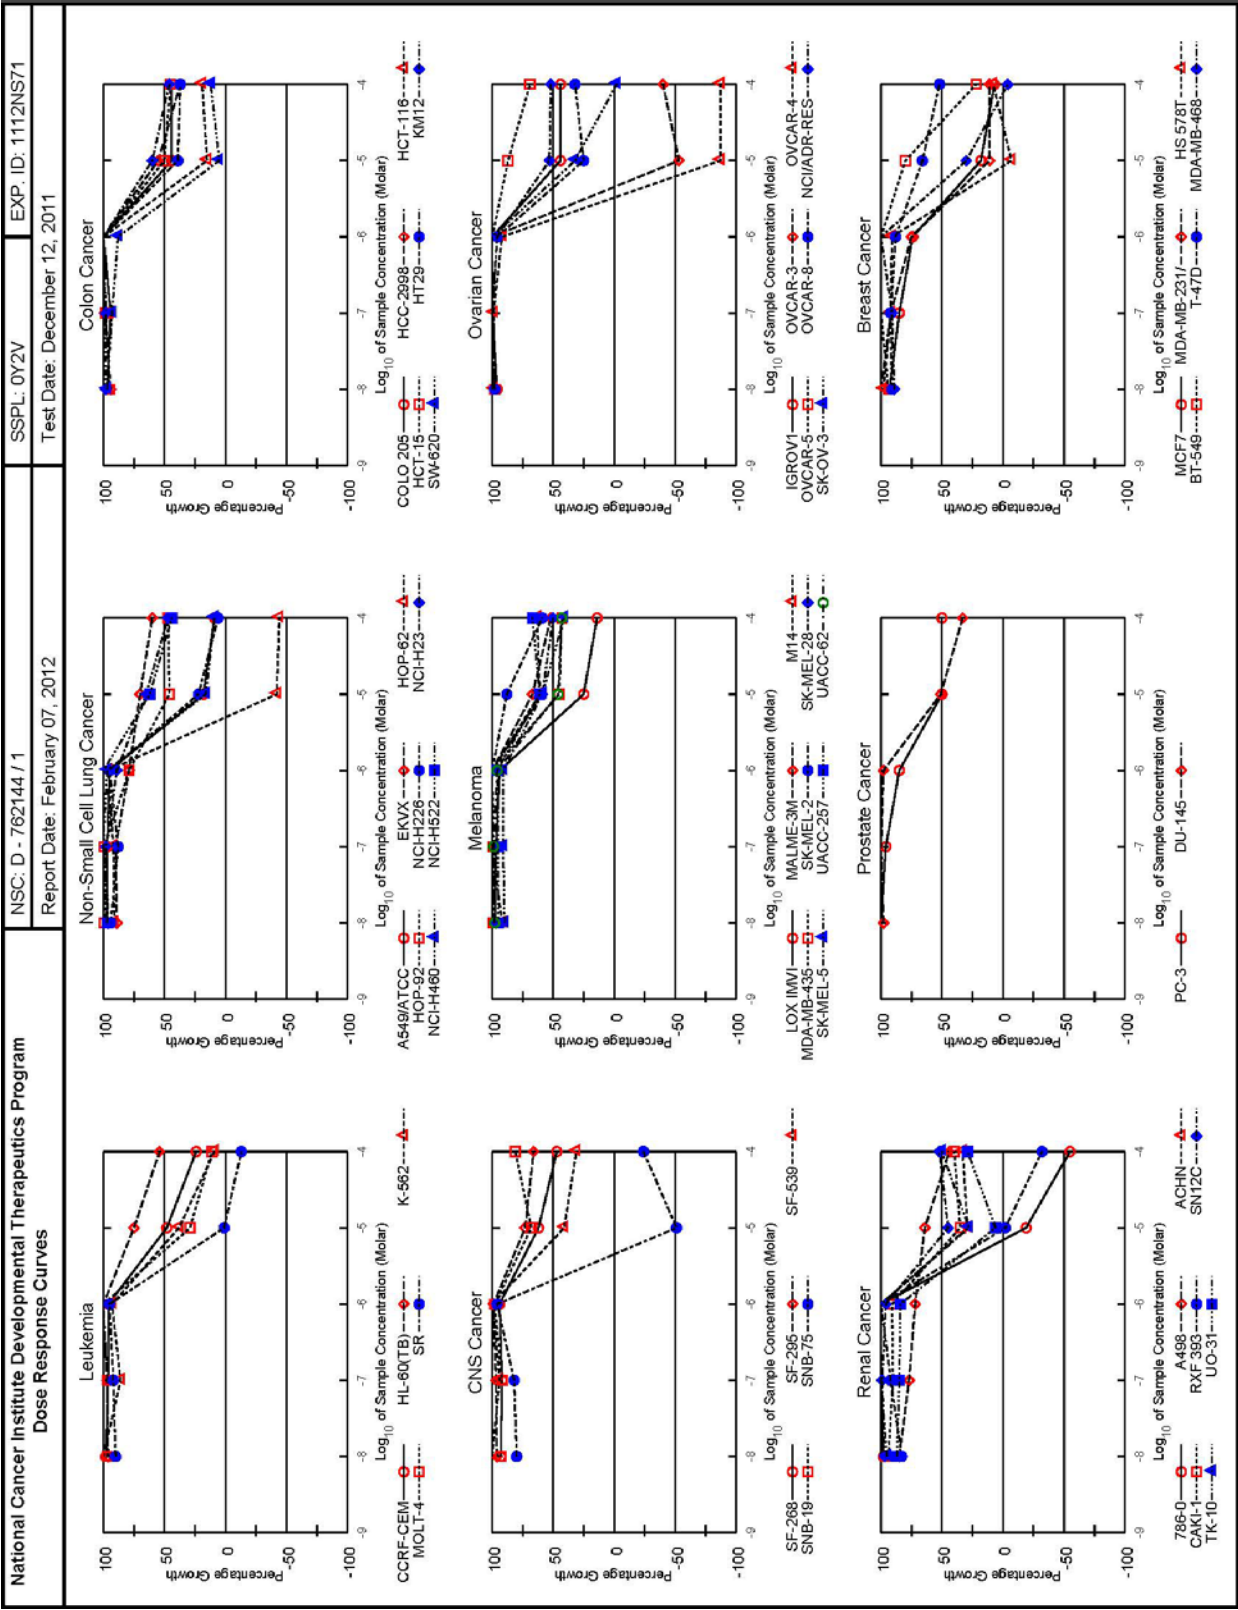

Figure S12: Complete Five Dose Assay data from NCI 60 cell lines for compound 11

| National Cancer Institute Developmental Therapeutics Program<br>In-Vitro Testing Results |           |       |                                       |       |       |       |       |      |                |      |      |      |               |           |           |     |      |
|------------------------------------------------------------------------------------------|-----------|-------|---------------------------------------|-------|-------|-------|-------|------|----------------|------|------|------|---------------|-----------|-----------|-----|------|
| NSC : D - 762144 / 1                                                                     |           |       | Experiment ID : 1112NS71              |       |       |       |       |      | Test Type : 08 |      |      |      | Units : Molar |           |           |     |      |
| Report Date : February 07, 2012                                                          |           |       | Test Date : December 12, 2011         |       |       |       |       |      | QNS :          |      |      |      | MC :          |           |           |     |      |
| COMI : CM-5-278-4-2 (111980)                                                             |           |       | Stain Reagent : SRB Dual-Pass Related |       |       |       |       |      | SSPL : 0Y2V    |      |      |      |               |           |           |     |      |
| Panel/Cell Line                                                                          | Time Zero | Ctrl  | Log10 Concentration                   |       |       |       |       |      | Percent Growth |      |      |      |               |           | GI50      | TGI | LC50 |
|                                                                                          |           |       | Mean Optical Densities                |       |       |       |       |      |                |      |      |      |               |           |           |     |      |
|                                                                                          |           |       | -8.0                                  | -7.0  | -6.0  | -5.0  | -4.0  | -8.0 | -7.0           | -6.0 | -5.0 | -4.0 |               |           |           |     |      |
| Leukemia                                                                                 |           |       |                                       |       |       |       |       |      |                |      |      |      |               |           |           |     |      |
| CCRF-CEM                                                                                 | 0.438     | 2.023 | 1.985                                 | 1.958 | 1.961 | 1.199 | 0.811 | 98   | 96             | 96   | 48   | 24   | 9.08E-6       | > 1.00E-4 | > 1.00E-4 |     |      |
| HL-60(TB)                                                                                | 0.860     | 2.718 | 2.644                                 | 2.667 | 2.942 | 2.257 | 1.864 | 96   | 97             | 112  | 75   | 54   | > 1.00E-4     | > 1.00E-4 | > 1.00E-4 |     |      |
| K-562                                                                                    | 0.167     | 1.357 | 1.415                                 | 1.192 | 1.277 | 0.621 | 0.280 | 105  | 86             | 93   | 38   | 9    | 6.10E-6       | > 1.00E-4 | > 1.00E-4 |     |      |
| MOLT-4                                                                                   | 0.461     | 1.988 | 1.945                                 | 1.936 | 2.078 | 0.910 | 0.635 | 97   | 97             | 106  | 29   | 11   | 5.38E-6       | > 1.00E-4 | > 1.00E-4 |     |      |
| SR                                                                                       | 0.316     | 1.902 | 1.744                                 | 1.770 | 1.825 | 0.337 | 0.276 | 90   | 92             | 95   | 1    | -13  | 3.03E-6       | 1.24E-5   | > 1.00E-4 |     |      |
| Non-Small Cell Lung Cancer                                                               |           |       |                                       |       |       |       |       |      |                |      |      |      |               |           |           |     |      |
| A549/ATCC                                                                                | 0.314     | 1.552 | 1.513                                 | 1.517 | 1.494 | 0.533 | 0.420 | 97   | 97             | 95   | 18   | 9    | 3.83E-6       | > 1.00E-4 | > 1.00E-4 |     |      |
| EKVX                                                                                     | 0.576     | 1.271 | 1.196                                 | 1.199 | 1.123 | 1.066 | 0.991 | 89   | 90             | 79   | 70   | 60   | > 1.00E-4     | > 1.00E-4 | > 1.00E-4 |     |      |
| HOP-62                                                                                   | 0.303     | 0.745 | 0.705                                 | 0.708 | 0.727 | 0.175 | 0.169 | 91   | 92             | 96   | -42  | -44  | 2.15E-6       | 4.94E-6   | > 1.00E-4 |     |      |
| HOP-92                                                                                   | 0.988     | 1.431 | 1.426                                 | 1.428 | 1.338 | 1.191 | 1.195 | 99   | 99             | 79   | 46   | 47   | 7.49E-6       | > 1.00E-4 | > 1.00E-4 |     |      |
| NCI-H226                                                                                 | 0.638     | 1.286 | 1.248                                 | 1.207 | 1.257 | 0.784 | 0.678 | 94   | 88             | 95   | 22   | 6    | 4.19E-6       | > 1.00E-4 | > 1.00E-4 |     |      |
| NCI-H23                                                                                  | 0.861     | 2.362 | 2.310                                 | 2.327 | 2.203 | 1.843 | 1.564 | 96   | 98             | 89   | 65   | 47   | 6.75E-5       | > 1.00E-4 | > 1.00E-4 |     |      |
| NCI-H460                                                                                 | 0.285     | 2.455 | 2.519                                 | 2.548 | 2.382 | 0.622 | 0.470 | 103  | 104            | 97   | 16   | 9    | 3.76E-6       | > 1.00E-4 | > 1.00E-4 |     |      |
| NCI-H522                                                                                 | 0.678     | 1.462 | 1.439                                 | 1.460 | 1.505 | 1.162 | 1.024 | 97   | 100            | 105  | 62   | 44   | 4.64E-5       | > 1.00E-4 | > 1.00E-4 |     |      |
| Colon Cancer                                                                             |           |       |                                       |       |       |       |       |      |                |      |      |      |               |           |           |     |      |
| COLO 205                                                                                 | 0.279     | 0.969 | 0.949                                 | 0.931 | 0.997 | 0.580 | 0.585 | 97   | 94             | 104  | 44   | 44   | 7.84E-6       | > 1.00E-4 | > 1.00E-4 |     |      |
| HCC-2998                                                                                 | 0.591     | 1.723 | 1.654                                 | 1.715 | 1.756 | 1.216 | 1.010 | 94   | 99             | 103  | 55   | 37   | 1.93E-5       | > 1.00E-4 | > 1.00E-4 |     |      |
| HCT-116                                                                                  | 0.219     | 1.617 | 1.624                                 | 1.651 | 1.646 | 0.422 | 0.486 | 100  | 102            | 102  | 15   | 19   | 3.93E-6       | > 1.00E-4 | > 1.00E-4 |     |      |
| HCT-15                                                                                   | 0.292     | 1.980 | 1.896                                 | 1.947 | 2.048 | 1.133 | 1.055 | 95   | 98             | 104  | 50   | 45   | 9.91E-6       | > 1.00E-4 | > 1.00E-4 |     |      |
| HT29                                                                                     | 0.198     | 1.156 | 1.200                                 | 1.222 | 1.235 | 0.570 | 0.551 | 105  | 107            | 108  | 39   | 37   | 6.90E-6       | > 1.00E-4 | > 1.00E-4 |     |      |
| KM12                                                                                     | 0.493     | 2.113 | 2.077                                 | 2.081 | 2.115 | 1.458 | 1.239 | 98   | 98             | 100  | 60   | 46   | 5.12E-5       | > 1.00E-4 | > 1.00E-4 |     |      |
| SW-620                                                                                   | 0.244     | 1.693 | 1.654                                 | 1.590 | 1.518 | 0.313 | 0.420 | 97   | 93             | 88   | 5    | 12   | 2.86E-6       | > 1.00E-4 | > 1.00E-4 |     |      |
| CNS Cancer                                                                               |           |       |                                       |       |       |       |       |      |                |      |      |      |               |           |           |     |      |
| SF-268                                                                                   | 0.496     | 1.653 | 1.577                                 | 1.564 | 1.585 | 1.218 | 1.046 | 93   | 92             | 94   | 62   | 47   | 6.78E-5       | > 1.00E-4 | > 1.00E-4 |     |      |
| SF-295                                                                                   | 0.819     | 2.588 | 2.521                                 | 2.535 | 2.566 | 2.116 | 1.979 | 96   | 97             | 99   | 73   | 66   | > 1.00E-4     | > 1.00E-4 | > 1.00E-4 |     |      |
| SF-539                                                                                   | 0.695     | 1.786 | 1.786                                 | 1.715 | 1.814 | 1.144 | 1.039 | 100  | 94             | 103  | 41   | 31   | 7.17E-6       | > 1.00E-4 | > 1.00E-4 |     |      |
| SNB-19                                                                                   | 0.650     | 1.915 | 1.826                                 | 1.817 | 1.888 | 1.509 | 1.673 | 93   | 92             | 98   | 68   | 81   | > 1.00E-4     | > 1.00E-4 | > 1.00E-4 |     |      |
| SNB-75                                                                                   | 0.735     | 1.242 | 1.141                                 | 1.150 | 1.221 | 0.358 | 0.560 | 80   | 82             | 96   | -51  | -24  | 2.05E-6       | 4.48E-6   | .         |     |      |
| Melanoma                                                                                 |           |       |                                       |       |       |       |       |      |                |      |      |      |               |           |           |     |      |
| LOX IMVI                                                                                 | 0.255     | 1.633 | 1.612                                 | 1.590 | 1.551 | 0.606 | 0.445 | 98   | 97             | 94   | 25   | 14   | 4.38E-6       | > 1.00E-4 | > 1.00E-4 |     |      |
| MALME-3M                                                                                 | 0.588     | 1.774 | 1.772                                 | 1.842 | 1.786 | 1.383 | 1.201 | 100  | 106            | 101  | 67   | 52   | > 1.00E-4     | > 1.00E-4 | > 1.00E-4 |     |      |
| M14                                                                                      | 0.415     | 1.396 | 1.319                                 | 1.447 | 1.450 | 1.016 | 1.038 | 92   | 105            | 105  | 61   | 63   | > 1.00E-4     | > 1.00E-4 | > 1.00E-4 |     |      |
| MDA-MB-435                                                                               | 0.473     | 1.999 | 1.979                                 | 1.982 | 2.027 | 1.153 | 1.132 | 99   | 99             | 102  | 45   | 43   | 8.02E-6       | > 1.00E-4 | > 1.00E-4 |     |      |
| SK-MEL-2                                                                                 | 0.861     | 1.768 | 1.789                                 | 1.824 | 1.850 | 1.663 | 1.395 | 102  | 106            | 109  | 88   | 59   | > 1.00E-4     | > 1.00E-4 | > 1.00E-4 |     |      |
| SK-MEL-28                                                                                | 0.507     | 1.332 | 1.309                                 | 1.377 | 1.334 | 0.994 | 0.922 | 97   | 106            | 100  | 59   | 50   | > 1.00E-4     | > 1.00E-4 | > 1.00E-4 |     |      |
| SK-MEL-5                                                                                 | 0.523     | 2.400 | 2.220                                 | 2.241 | 2.238 | 1.627 | 1.286 | 90   | 91             | 91   | 59   | 41   | 3.05E-5       | > 1.00E-4 | > 1.00E-4 |     |      |
| UACC-257                                                                                 | 0.550     | 1.294 | 1.257                                 | 1.258 | 1.267 | 1.002 | 1.049 | 95   | 95             | 96   | 61   | 67   | > 1.00E-4     | > 1.00E-4 | > 1.00E-4 |     |      |
| UACC-62                                                                                  | 0.579     | 2.143 | 2.119                                 | 2.120 | 2.080 | 1.306 | 1.250 | 98   | 99             | 96   | 46   | 43   | 8.49E-6       | > 1.00E-4 | > 1.00E-4 |     |      |
| Ovarian Cancer                                                                           |           |       |                                       |       |       |       |       |      |                |      |      |      |               |           |           |     |      |
| IGROV1                                                                                   | 0.590     | 1.333 | 1.305                                 | 1.335 | 1.368 | 0.920 | 0.914 | 96   | 100            | 105  | 44   | 44   | 8.07E-6       | > 1.00E-4 | > 1.00E-4 |     |      |
| OVCAR-3                                                                                  | 0.517     | 1.343 | 1.351                                 | 1.386 | 1.422 | 0.245 | 0.310 | 101  | 105            | 110  | -53  | -40  | 2.33E-6       | 4.74E-6   | .         |     |      |
| OVCAR-4                                                                                  | 0.534     | 1.091 | 1.086                                 | 1.083 | 1.045 | 0.068 | 0.070 | 99   | 99             | 92   | -87  | -87  | 1.71E-6       | 3.25E-6   | 6.19E-6   |     |      |
| OVCAR-5                                                                                  | 0.597     | 1.539 | 1.517                                 | 1.584 | 1.610 | 1.417 | 1.246 | 98   | 105            | 108  | 87   | 69   | > 1.00E-4     | > 1.00E-4 | > 1.00E-4 |     |      |
| OVCAR-8                                                                                  | 0.417     | 1.796 | 1.764                                 | 1.809 | 1.739 | 0.757 | 0.856 | 98   | 101            | 96   | 25   | 32   | 4.41E-6       | > 1.00E-4 | > 1.00E-4 |     |      |
| NCI/ADR-RES                                                                              | 0.532     | 1.782 | 1.807                                 | 1.792 | 1.738 | 1.195 | 1.184 | 102  | 101            | 96   | 53   | 52   | > 1.00E-4     | > 1.00E-4 | > 1.00E-4 |     |      |
| SK-OV-3                                                                                  | 0.487     | 1.113 | 1.116                                 | 1.123 | 1.130 | 0.690 | 0.476 | 100  | 102            | 103  | 32   | -2   | 5.62E-6       | 8.55E-5   | > 1.00E-4 |     |      |
| Renal Cancer                                                                             |           |       |                                       |       |       |       |       |      |                |      |      |      |               |           |           |     |      |
| 786-O                                                                                    | 0.834     | 2.295 | 2.263                                 | 2.322 | 2.378 | 0.673 | 0.375 | 98   | 102            | 106  | -19  | -55  | 2.79E-6       | 7.00E-6   | 7.20E-5   |     |      |
| A498                                                                                     | 1.307     | 1.779 | 1.709                                 | 1.670 | 1.647 | 1.611 | 1.515 | 85   | 77             | 72   | 64   | 44   | 5.05E-5       | > 1.00E-4 | > 1.00E-4 |     |      |
| ACHN                                                                                     | 0.312     | 1.332 | 1.385                                 | 1.380 | 1.442 | 0.606 | 0.646 | 105  | 105            | 111  | 29   | 33   | 5.51E-6       | > 1.00E-4 | > 1.00E-4 |     |      |
| CAKI-1                                                                                   | 0.638     | 1.954 | 1.880                                 | 1.820 | 1.835 | 1.099 | 1.166 | 94   | 90             | 91   | 35   | 40   | 5.39E-6       | > 1.00E-4 | > 1.00E-4 |     |      |
| RXF 393                                                                                  | 0.656     | 1.103 | 1.027                                 | 1.069 | 1.123 | 0.646 | 0.445 | 83   | 92             | 105  | -2   | -32  | 3.27E-6       | 9.66E-6   | > 1.00E-4 |     |      |
| SN12C                                                                                    | 0.466     | 1.951 | 1.906                                 | 1.936 | 1.889 | 1.127 | 1.240 | 97   | 99             | 96   | 45   | 52   | .             | > 1.00E-4 | > 1.00E-4 |     |      |
| TK-10                                                                                    | 0.738     | 1.336 | 1.308                                 | 1.340 | 1.524 | 0.906 | 1.039 | 95   | 101            | 131  | 28   | 50   | .             | > 1.00E-4 | > 1.00E-4 |     |      |
| UO-31                                                                                    | 0.555     | 1.769 | 1.606                                 | 1.590 | 1.577 | 0.625 | 0.911 | 87   | 85             | 84   | 6    | 29   | 2.73E-6       | > 1.00E-4 | > 1.00E-4 |     |      |
| Prostate Cancer                                                                          |           |       |                                       |       |       |       |       |      |                |      |      |      |               |           |           |     |      |
| PC-3                                                                                     | 0.513     | 1.957 | 1.962                                 | 1.896 | 1.746 | 1.230 | 1.231 | 100  | 96             | 85   | 50   | 50   | 9.76E-6       | > 1.00E-4 | > 1.00E-4 |     |      |
| DU-145                                                                                   | 0.381     | 1.272 | 1.255                                 | 1.301 | 1.257 | 0.834 | 0.675 | 98   | 103            | 98   | 51   | 33   | 1.12E-5       | > 1.00E-4 | > 1.00E-4 |     |      |
| Breast Cancer                                                                            |           |       |                                       |       |       |       |       |      |                |      |      |      |               |           |           |     |      |
| MCF7                                                                                     | 0.268     | 1.547 | 1.452                                 | 1.355 | 1.219 | 0.499 | 0.361 | 93   | 85             | 74   | 18   | 7    | 2.71E-6       | > 1.00E-4 | > 1.00E-4 |     |      |
| MDA-MB-231/ATCC                                                                          | 0.490     | 1.150 | 1.171                                 | 1.097 | 0.983 | 0.560 | 0.561 | 103  | 92             | 75   | 11   | 11   | 2.43E-6       | > 1.00E-4 | > 1.00E-4 |     |      |
| HS 578T                                                                                  | 1.204     | 1.930 | 1.914                                 | 1.869 | 1.863 | 1.119 | 1.261 | 98   | 92             | 91   | -7   | 8    | 2.61E-6       | .         | > 1.00E-4 |     |      |
| BT-549                                                                                   | 0.840     | 1.463 | 1.427                                 | 1.528 | 1.611 | 1.337 | 0.980 | 94   | 110            | 124  | 80   | 22   | 3.31E-5       | > 1.00E-4 | > 1.00E-4 |     |      |
| T-47D                                                                                    | 0.624     | 1.623 | 1.536                                 | 1.540 | 1.503 | 1.288 | 1.148 | 91   | 92             | 88   | 66   | 52   | > 1.00E-4     | > 1.00E-4 | > 1.00E-4 |     |      |
| MDA-MB-468                                                                               | 0.549     | 0.844 | 0.811                                 | 0.816 | 0.888 | 0.638 | 0.526 | 89   | 91             | 115  | 30   | -4   | 5.82E-6       | 7.54E-5   | > 1.00E-4 |     |      |

**Figure S13: Complete Five Dose Assay data from NCI 60 cell lines for compound 11**

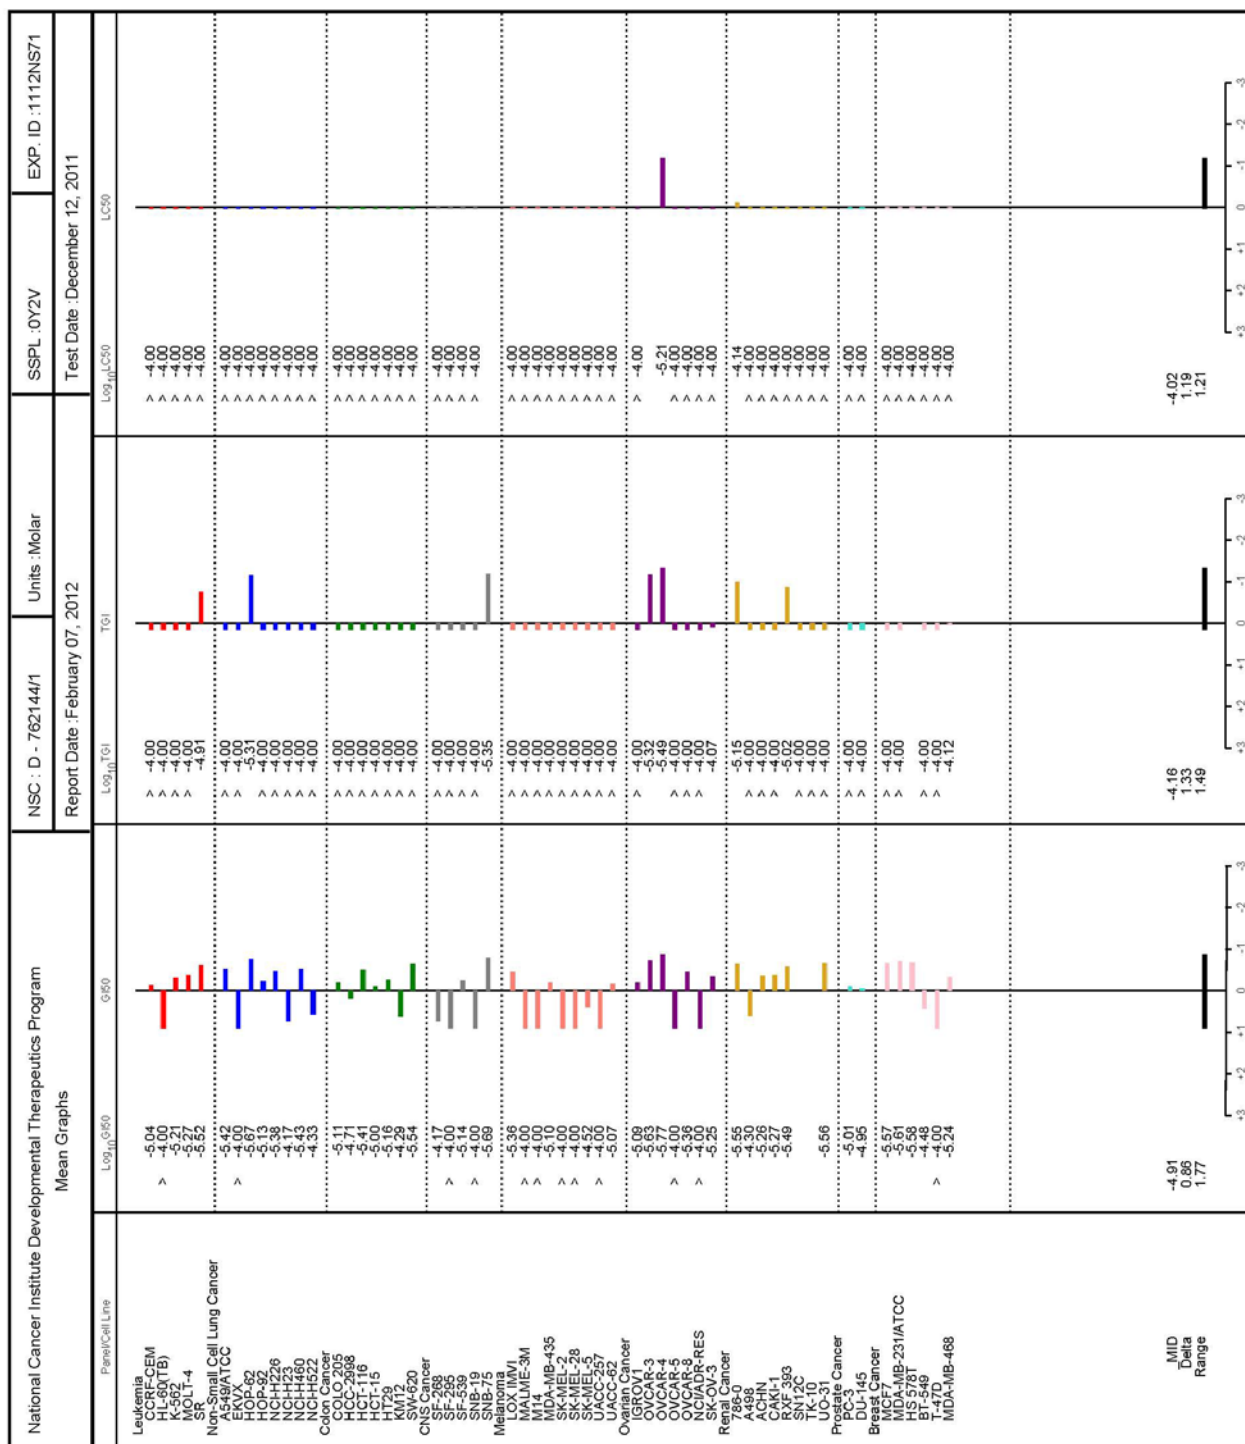



Figure S14: Five Dose Assay data graph from NCI 60 cell lines for compound 13

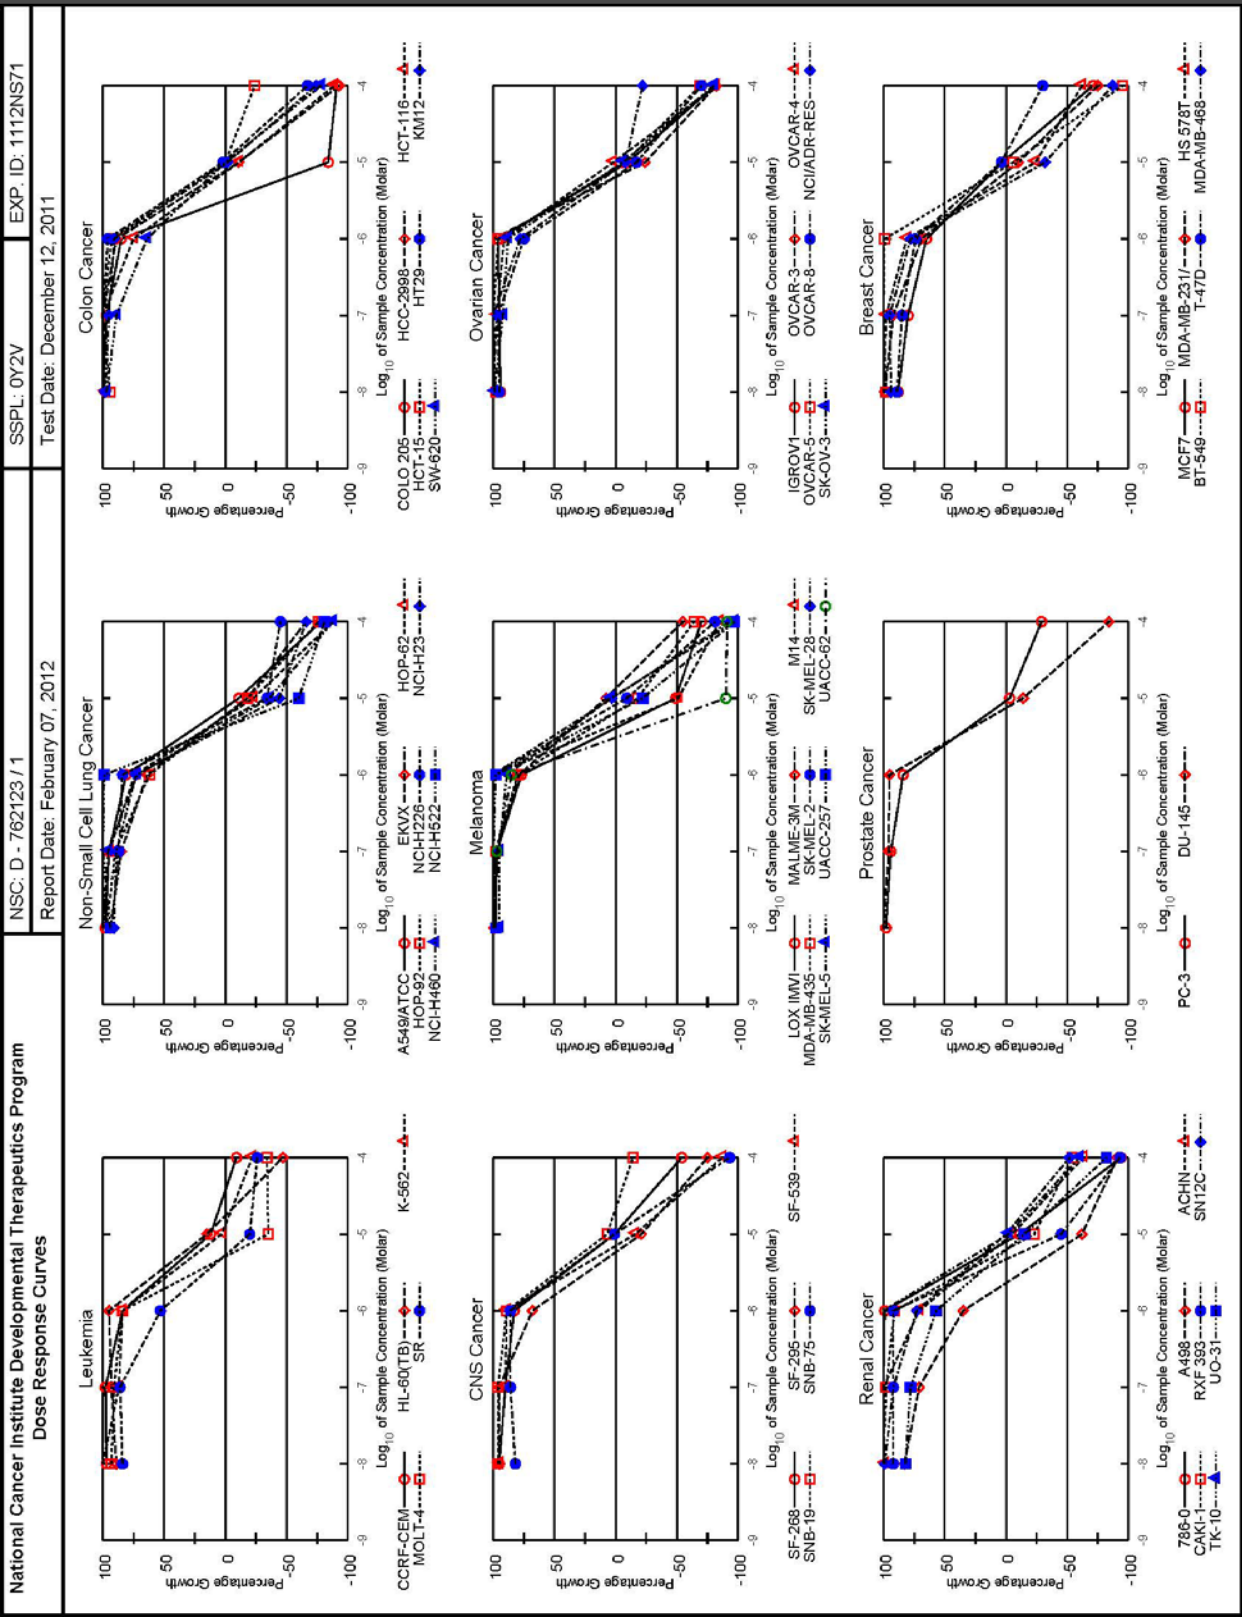

Figure S15: Complete Five Dose Assay data from NCI 60 cell lines for compound 13

| National Cancer Institute Developmental Therapeutics Program<br>In-Vitro Testing Results |              |       |                                       |       |       |       |       |                |                |      |      |               |         |         |           |
|------------------------------------------------------------------------------------------|--------------|-------|---------------------------------------|-------|-------|-------|-------|----------------|----------------|------|------|---------------|---------|---------|-----------|
| NSC : D - 762123 / 1                                                                     |              |       | Experiment ID : 1112NS71              |       |       |       |       |                | Test Type : 08 |      |      | Units : Molar |         |         |           |
| Report Date : February 07, 2012                                                          |              |       | Test Date : December 12, 2011         |       |       |       |       |                | QNS :          |      |      | MC :          |         |         |           |
| COMI : CM3-112-5 (111402)                                                                |              |       | Stain Reagent : SRB Dual-Pass Related |       |       |       |       |                | SSPL : 0Y2V    |      |      |               |         |         |           |
| Log10 Concentration                                                                      |              |       |                                       |       |       |       |       |                |                |      |      |               |         |         |           |
| Panel/Cell Line                                                                          | Time<br>Zero | Ctrl  | Mean Optical Densities                |       |       |       |       | Percent Growth |                |      |      |               | GI50    | TGI     | LC50      |
|                                                                                          |              |       | -8.0                                  | -7.0  | -6.0  | -5.0  | -4.0  | -8.0           | -7.0           | -6.0 | -5.0 | -4.0          |         |         |           |
| Leukemia                                                                                 |              |       |                                       |       |       |       |       |                |                |      |      |               |         |         |           |
| CCRF-CEM                                                                                 | 0.438        | 2.083 | 2.030                                 | 2.052 | 1.821 | 0.643 | 0.398 | 97             | 98             | 84   | 12   | -9            | 2.99E-6 | 3.74E-5 | > 1.00E-4 |
| HL-60(TB)                                                                                | 0.860        | 2.628 | 2.434                                 | 2.502 | 2.537 | 1.121 | 0.460 | 89             | 93             | 95   | 15   | -47           | 3.63E-6 | 1.74E-5 | > 1.00E-4 |
| K-562                                                                                    | 0.167        | 1.390 | 1.401                                 | 1.230 | 1.193 | 0.200 | 0.131 | 101            | 87             | 84   | 3    | -22           | 2.61E-6 | 1.28E-5 | > 1.00E-4 |
| MOLT-4                                                                                   | 0.461        | 1.879 | 1.785                                 | 1.752 | 1.652 | 0.300 | 0.306 | 93             | 91             | 84   | -35  | -34           | 1.93E-6 | 5.08E-6 | > 1.00E-4 |
| SR                                                                                       | 0.316        | 1.791 | 1.549                                 | 1.585 | 1.105 | 0.254 | 0.235 | 84             | 86             | 53   | -20  | -26           | 1.12E-6 | 5.37E-6 | > 1.00E-4 |
| Non-Small Cell Lung Cancer                                                               |              |       |                                       |       |       |       |       |                |                |      |      |               |         |         |           |
| A549/ATCC                                                                                | 0.314        | 1.418 | 1.392                                 | 1.366 | 1.207 | 0.281 | 0.071 | 98             | 95             | 81   | -11  | -78           | 2.17E-6 | 7.65E-6 | 3.87E-5   |
| EKVX                                                                                     | 0.576        | 1.239 | 1.201                                 | 1.142 | 1.000 | 0.471 | 0.197 | 94             | 85             | 64   | -18  | -66           | 1.48E-6 | 5.99E-6 | 4.64E-5   |
| HOP-62                                                                                   | 0.303        | 0.691 | 0.709                                 | 0.670 | 0.591 | 0.233 | 0.037 | 105            | 95             | 74   | -23  | -88           | 1.77E-6 | 5.77E-6 | 2.60E-5   |
| HOP-92                                                                                   | 0.988        | 1.386 | 1.374                                 | 1.347 | 1.237 | 0.815 | 0.239 | 97             | 90             | 62   | -18  | -76           | 1.43E-6 | 6.04E-6 | 3.80E-5   |
| NCI-H226                                                                                 | 0.638        | 1.272 | 1.226                                 | 1.191 | 1.168 | 0.422 | 0.353 | 93             | 87             | 84   | -34  | -45           | 1.93E-6 | 5.15E-6 | > 1.00E-4 |
| NCI-H23                                                                                  | 0.861        | 2.235 | 2.117                                 | 2.081 | 1.860 | 0.482 | 0.291 | 91             | 89             | 73   | -44  | -66           | 1.57E-6 | 4.20E-6 | 1.86E-5   |
| NCI-H460                                                                                 | 0.285        | 2.290 | 2.302                                 | 2.215 | 1.736 | 0.182 | 0.035 | 101            | 96             | 72   | -36  | -88           | 1.61E-6 | 4.64E-6 | 1.85E-5   |
| NCI-H522                                                                                 | 0.678        | 1.392 | 1.347                                 | 1.390 | 1.383 | 0.274 | 0.126 | 94             | 100            | 99   | -60  | -81           | 2.03E-6 | 4.20E-6 | 8.70E-6   |
| Colon Cancer                                                                             |              |       |                                       |       |       |       |       |                |                |      |      |               |         |         |           |
| COLO 205                                                                                 | 0.279        | 0.955 | 0.963                                 | 0.935 | 0.851 | 0.045 | 0.024 | 101            | 97             | 85   | -84  | -91           | 1.60E-6 | 3.17E-6 | 6.28E-6   |
| HCC-2998                                                                                 | 0.591        | 1.600 | 1.593                                 | 1.673 | 1.492 | 0.527 | 0.040 | 99             | 107            | 89   | -11  | -93           | 2.47E-6 | 7.78E-6 | 2.98E-5   |
| HCT-116                                                                                  | 0.219        | 1.514 | 1.484                                 | 1.607 | 1.196 | 0.195 | 0.025 | 98             | 107            | 75   | -11  | -89           | 1.97E-6 | 7.47E-6 | 3.18E-5   |
| HCT-15                                                                                   | 0.292        | 1.807 | 1.723                                 | 1.803 | 1.700 | 0.291 | 0.222 | 94             | 100            | 93   | .    | -24           | 2.88E-6 | 9.92E-6 | > 1.00E-4 |
| HT29                                                                                     | 0.198        | 1.114 | 1.112                                 | 1.135 | 1.081 | 0.216 | 0.065 | 100            | 102            | 96   | 2    | -67           | 3.09E-6 | 1.07E-5 | 5.61E-5   |
| KM12                                                                                     | 0.493        | 2.032 | 2.003                                 | 1.962 | 1.891 | 0.484 | 0.130 | 98             | 95             | 91   | -2   | -74           | 2.76E-6 | 9.53E-6 | 4.67E-5   |
| SW-620                                                                                   | 0.244        | 1.548 | 1.511                                 | 1.407 | 1.076 | 0.247 | 0.054 | 97             | 89             | 64   | .    | -78           | 1.65E-6 | 1.01E-5 | 4.40E-5   |
| CNS Cancer                                                                               |              |       |                                       |       |       |       |       |                |                |      |      |               |         |         |           |
| SF-268                                                                                   | 0.496        | 1.531 | 1.483                                 | 1.423 | 1.358 | 0.506 | 0.228 | 95             | 90             | 83   | 1    | -54           | 2.53E-6 | 1.04E-5 | 8.41E-5   |
| SF-295                                                                                   | 0.819        | 2.664 | 2.568                                 | 2.563 | 2.069 | 0.644 | 0.207 | 95             | 95             | 68   | -21  | -75           | 1.58E-6 | 5.75E-6 | 3.43E-5   |
| SF-539                                                                                   | 0.695        | 1.677 | 1.628                                 | 1.578 | 1.572 | 0.585 | 0.090 | 95             | 90             | 89   | -16  | -87           | 2.36E-6 | 7.07E-6 | 3.02E-5   |
| SNB-19                                                                                   | 0.650        | 1.873 | 1.829                                 | 1.825 | 1.743 | 0.737 | 0.557 | 96             | 96             | 89   | 7    | -14           | 3.01E-6 | 2.15E-5 | > 1.00E-4 |
| SNB-75                                                                                   | 0.735        | 1.285 | 1.188                                 | 1.209 | 1.206 | 0.742 | 0.049 | 82             | 86             | 86   | 1    | -93           | 2.65E-6 | 1.03E-5 | 3.48E-5   |
| Melanoma                                                                                 |              |       |                                       |       |       |       |       |                |                |      |      |               |         |         |           |
| LOX IMVI                                                                                 | 0.255        | 1.506 | 1.480                                 | 1.471 | 1.218 | 0.129 | 0.077 | 98             | 97             | 77   | -49  | -70           | 1.63E-6 | 4.06E-6 | 1.07E-5   |
| MALME-3M                                                                                 | 0.588        | 1.793 | 1.778                                 | 1.772 | 1.542 | 0.681 | 0.264 | 99             | 98             | 79   | 8    | -55           | 2.56E-6 | 1.33E-5 | 8.29E-5   |
| M14                                                                                      | 0.415        | 1.237 | 1.254                                 | 1.329 | 1.286 | 0.202 | 0.063 | 102            | 111            | 106  | -51  | -85           | 2.27E-6 | 4.71E-6 | 9.79E-6   |
| MDA-MB-435                                                                               | 0.473        | 1.925 | 1.902                                 | 1.903 | 1.634 | 0.387 | 0.172 | 98             | 98             | 80   | -18  | -64           | 2.02E-6 | 6.51E-6 | 5.00E-5   |
| SK-MEL-2                                                                                 | 0.861        | 1.601 | 1.603                                 | 1.669 | 1.671 | 0.780 | 0.166 | 100            | 109            | 109  | -9   | -81           | 3.16E-6 | 8.33E-6 | 3.71E-5   |
| SK-MEL-28                                                                                | 0.507        | 1.416 | 1.437                                 | 1.487 | 1.457 | 0.534 | 0.033 | 102            | 108            | 105  | 3    | -93           | 3.44E-6 | 1.07E-5 | 3.54E-5   |
| SK-MEL-5                                                                                 | 0.523        | 2.479 | 2.373                                 | 2.387 | 2.265 | 0.610 | 0.018 | 95             | 95             | 89   | 4    | -97           | 2.90E-6 | 1.11E-5 | 3.46E-5   |
| UACC-257                                                                                 | 0.550        | 1.136 | 1.123                                 | 1.153 | 1.123 | 0.427 | 0.017 | 98             | 103            | 98   | -22  | -97           | 2.50E-6 | 6.51E-6 | 2.35E-5   |
| UACC-62                                                                                  | 0.579        | 1.948 | 1.981                                 | 1.913 | 1.738 | 0.059 | 0.051 | 102            | 97             | 85   | -90  | -91           | 1.58E-6 | 3.06E-6 | 5.91E-6   |
| Ovarian Cancer                                                                           |              |       |                                       |       |       |       |       |                |                |      |      |               |         |         |           |
| IGROV1                                                                                   | 0.590        | 1.284 | 1.245                                 | 1.251 | 1.255 | 0.532 | 0.112 | 94             | 95             | 96   | -10  | -81           | 2.71E-6 | 8.06E-6 | 3.66E-5   |
| OVCAR-3                                                                                  | 0.517        | 1.310 | 1.330                                 | 1.314 | 1.310 | 0.395 | 0.091 | 102            | 101            | 100  | -24  | -82           | 2.53E-6 | 6.43E-6 | 2.80E-5   |
| OVCAR-4                                                                                  | 0.534        | 1.141 | 1.140                                 | 1.123 | 1.088 | 0.544 | 0.097 | 100            | 97             | 91   | 2    | -82           | 2.88E-6 | 1.04E-5 | 4.15E-5   |
| OVCAR-5                                                                                  | 0.597        | 1.453 | 1.436                                 | 1.539 | 1.422 | 0.551 | 0.186 | 98             | 110            | 96   | -8   | -69           | 2.78E-6 | 8.42E-6 | 4.91E-5   |
| OVCAR-8                                                                                  | 0.417        | 1.651 | 1.591                                 | 1.600 | 1.340 | 0.345 | 0.124 | 95             | 96             | 75   | -17  | -70           | 1.86E-6 | 6.48E-6 | 4.14E-5   |
| NCI/ADR-RES                                                                              | 0.532        | 1.678 | 1.697                                 | 1.716 | 1.426 | 0.488 | 0.413 | 102            | 103            | 78   | -8   | -22           | 2.11E-6 | 8.00E-6 | > 1.00E-4 |
| SK-OV-3                                                                                  | 0.487        | 1.113 | 1.109                                 | 1.062 | 1.037 | 0.459 | 0.100 | 99             | 92             | 88   | -6   | -80           | 2.54E-6 | 8.68E-6 | 3.98E-5   |
| Renal Cancer                                                                             |              |       |                                       |       |       |       |       |                |                |      |      |               |         |         |           |
| 786-0                                                                                    | 0.834        | 2.220 | 2.217                                 | 2.229 | 2.203 | 0.746 | 0.053 | 100            | 101            | 99   | -11  | -94           | 2.79E-6 | 8.01E-6 | 2.98E-5   |
| A498                                                                                     | 1.307        | 1.744 | 1.669                                 | 1.620 | 1.460 | 0.494 | 0.114 | 83             | 71             | 35   | -62  | -91           | 3.86E-7 | 2.29E-6 | 7.48E-6   |
| ACHN                                                                                     | 0.312        | 1.277 | 1.264                                 | 1.286 | 0.999 | 0.297 | 0.117 | 99             | 101            | 71   | -5   | -63           | 1.90E-6 | 8.64E-6 | 6.07E-5   |
| CAKI-1                                                                                   | 0.638        | 1.856 | 1.882                                 | 1.832 | 1.743 | 0.492 | 0.292 | 102            | 98             | 91   | -23  | -54           | 2.28E-6 | 6.28E-6 | 7.32E-5   |
| RXF 393                                                                                  | 0.656        | 1.086 | 1.053                                 | 1.050 | 1.051 | 0.363 | 0.044 | 92             | 92             | 92   | -45  | -93           | 2.03E-6 | 4.70E-6 | 1.28E-5   |
| SN12C                                                                                    | 0.466        | 1.816 | 1.809                                 | 1.708 | 1.447 | 0.472 | 0.223 | 99             | 92             | 73   | .    | -52           | 2.06E-6 | 1.02E-5 | 9.10E-5   |
| TK-10                                                                                    | 0.738        | 1.246 | 1.259                                 | 1.334 | 1.447 | 0.721 | 0.298 | 102            | 117            | 139  | -2   | -60           | 4.27E-6 | 9.62E-6 | 6.79E-5   |
| UO-31                                                                                    | 0.555        | 1.719 | 1.508                                 | 1.464 | 1.217 | 0.474 | 0.103 | 82             | 78             | 57   | -15  | -82           | 1.25E-6 | 6.24E-6 | 3.38E-5   |
| Prostate Cancer                                                                          |              |       |                                       |       |       |       |       |                |                |      |      |               |         |         |           |
| PC-3                                                                                     | 0.513        | 1.913 | 1.891                                 | 1.826 | 1.684 | 0.496 | 0.363 | 98             | 94             | 84   | -3   | -29           | 2.43E-6 | 9.14E-6 | > 1.00E-4 |
| DU-145                                                                                   | 0.381        | 1.201 | 1.222                                 | 1.166 | 1.157 | 0.328 | 0.060 | 103            | 96             | 95   | -14  | -84           | 2.58E-6 | 7.44E-6 | 3.26E-5   |
| Breast Cancer                                                                            |              |       |                                       |       |       |       |       |                |                |      |      |               |         |         |           |
| MCF7                                                                                     | 0.268        | 1.555 | 1.401                                 | 1.296 | 1.103 | 0.305 | 0.079 | 88             | 80             | 65   | 3    | -71           | 1.74E-6 | 1.09E-5 | 5.23E-5   |
| MDA-MB-231/ATCC                                                                          | 0.490        | 0.995 | 0.989                                 | 0.953 | 0.839 | 0.440 | 0.124 | 99             | 92             | 69   | -10  | -75           | 1.74E-6 | 7.44E-6 | 4.13E-5   |
| HS 578T                                                                                  | 1.204        | 1.793 | 1.791                                 | 1.780 | 1.679 | 0.917 | 0.457 | 100            | 98             | 81   | -24  | -62           | 1.96E-6 | 5.91E-6 | 4.84E-5   |
| BT-549                                                                                   | 0.840        | 1.393 | 1.384                                 | 1.470 | 1.386 | 0.793 | 0.044 | 98             | 114            | 99   | -6   | -95           | 2.93E-6 | 8.84E-6 | 3.15E-5   |
| T-47D                                                                                    | 0.624        | 1.643 | 1.536                                 | 1.486 | 1.381 | 0.665 | 0.440 | 89             | 85             | 74   | 4    | -30           | 2.21E-6 | 1.31E-5 | > 1.00E-4 |
| MDA-MB-468                                                                               | 0.549        | 0.835 | 0.817                                 | 0.822 | 0.772 | 0.374 | 0.074 | 94             | 95             | 78   | -32  | -87           | 1.79E-6 | 5.12E-6 | 2.14E-5   |



Figure S16: Complete Five Dose Assay data from NCI 60 cell lines for compound 13

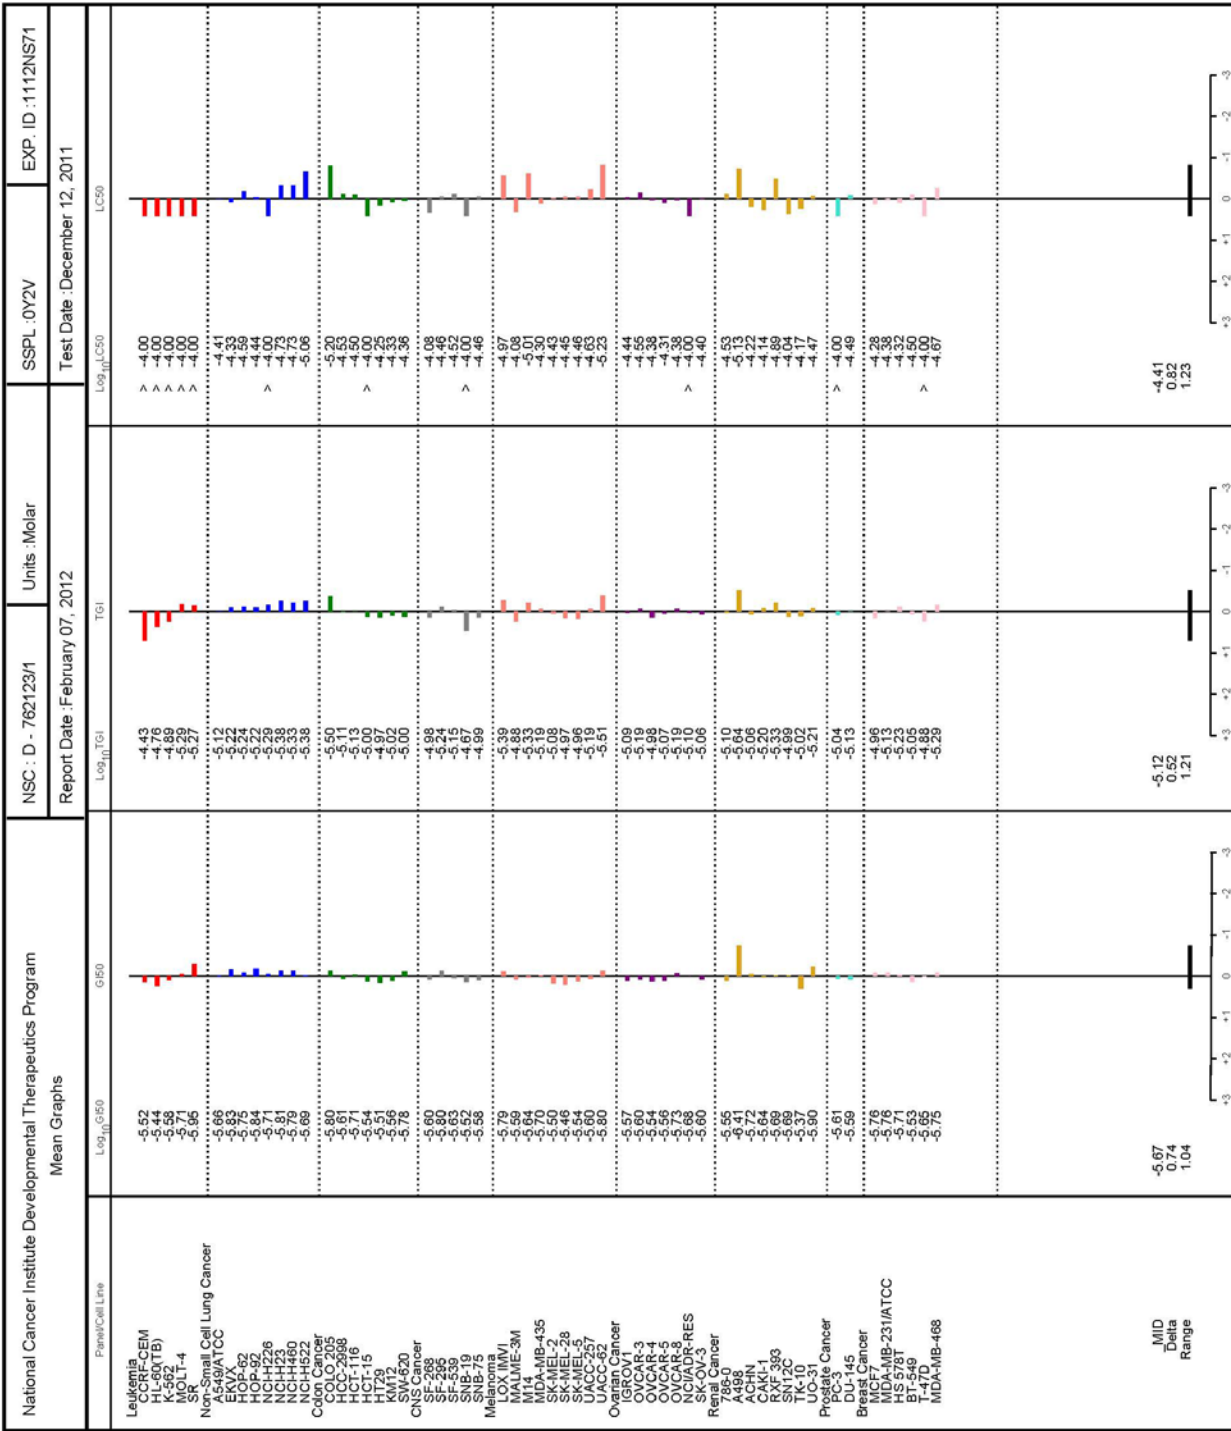

Figure S17: COMPARE Analysis data for compound 13 (Black Bars) in direct comparison with SCH1473759 (NSC761691, Red Lines), an Aurora kinase inhibitor.

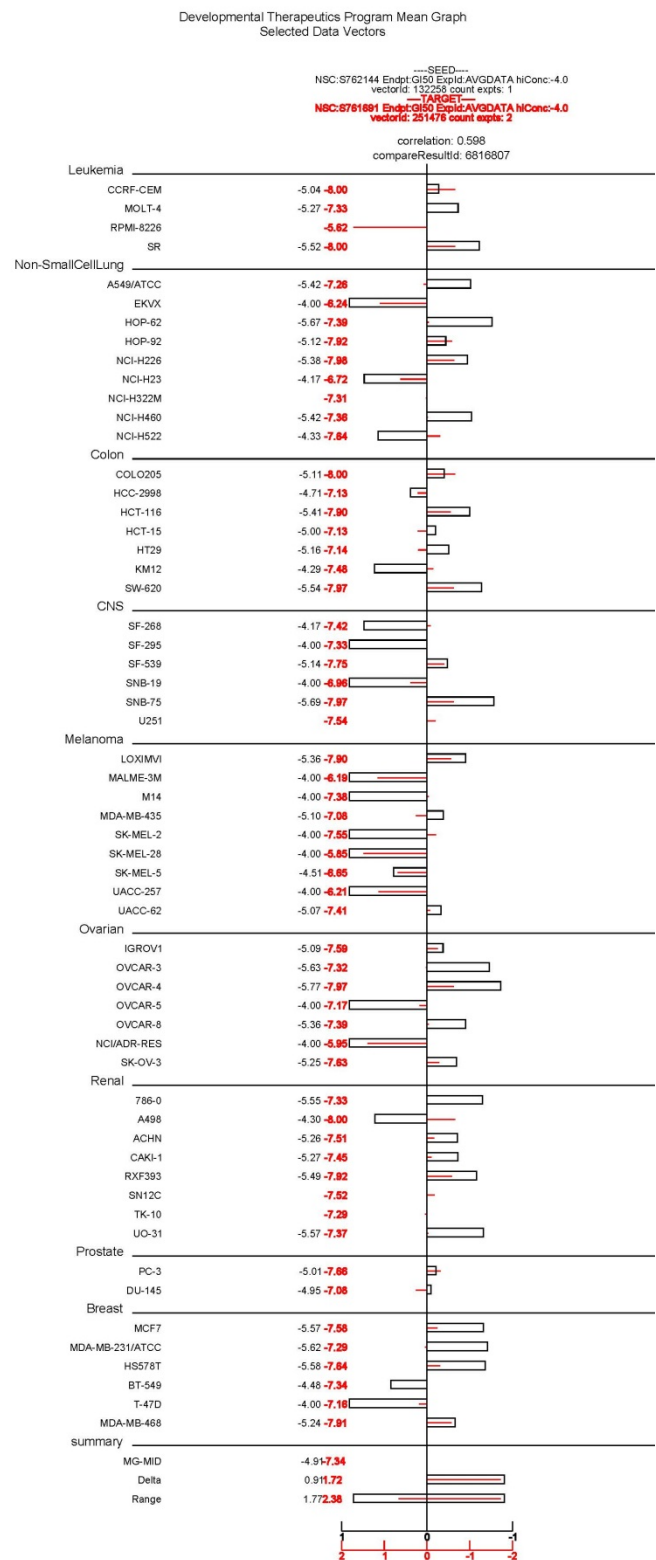

Supplement: s1 [file s1]
